# Supplementary material
Source: PubMed Central journal article supplement (PMC7105951)
Supplement: jamacardiol-5-773-s001.pdf [file jamacardiol-5-773-s001.pdf]

## Supplementary Online Content

Reynolds HR, Shaw LJ, Min JK, et al; the ISCHEMIA Research Group. Association of sex with severity of coronary artery disease, ischemia, and symptom burden in patients with moderate or severe ischemia: secondary analysis of the ISCHEMIA randomized clinical trial. *JAMA Cardiol*. Published online March 30, 2020. doi:10.1001/jamacardio.2020.0822

**eTable 1.** Enrolled Participant Baseline Characteristics by Sex, including Stress Testing

**eTable 2.** Functional Capacity According to Imaging Modality by Sex among Randomized Participants

**eTable 3.** Extent of CAD by Sex among Enrolled Participants Undergoing Coronary CT Angiography with Core Lab-Verified Moderate-Severe Ischemia

**eTable 4.** Randomized Participant Baseline Medications by Sex

**eTable 5.** Vital Signs, Laboratory Values and Functional Status by Sex among Randomized Participants

**eTable 6.** Study Personnel

**eTable 7.** ISCHEMIA Committee, CCC, Trial-Related Personnel

This supplementary material has been provided by the authors to give readers additional information about their work.

**eTable 1. Enrolled Participant Baseline Characteristics by Sex, including Stress Testing**

| Characteristic                                        | Enrolled Women<br>(N = 2,262) | Enrolled Men<br>(N = 6,256) | P-value |
|-------------------------------------------------------|-------------------------------|-----------------------------|---------|
| <b>Demographics</b>                                   |                               |                             |         |
| Age at Enrollment (yrs.)                              |                               |                             |         |
| Median (25th, 75th)                                   | 64 (57, 70)                   | 63 (56, 69)                 | 0.10    |
| Race                                                  |                               |                             |         |
| American Indian or Alaskan Native                     | 7/2,232 (0.3%)                | 13/6,201 (0.2%)             | <.001   |
| Asian                                                 | 578/2,232 (25.9%)             | 1,990/6,201 (32.1%)         |         |
| Native Hawaiian or Other Pacific Islander             | 4/2,232 (0.2%)                | 15/6,201 (0.2%)             |         |
| Black or African American                             | 134/2,232 (6.0%)              | 276/6,201 (4.5%)            |         |
| White                                                 | 1,504/2,232 (67.4%)           | 3,891/6,201 (62.7%)         |         |
| Multiple Races Reported                               | 5/2,232 (0.2%)                | 16/6,201 (0.3%)             |         |
| Ethnicity                                             |                               |                             |         |
| Hispanic or Latino                                    | 324/2,123 (15.3%)             | 795/5,801 (13.7%)           | 0.08    |
| Not Hispanic or Latino                                | 1,799/2,123 (84.7%)           | 5,006/5,801 (86.3%)         |         |
| <b>Clinical History</b>                               |                               |                             |         |
| Hypertension                                          | 1,685/2,247 (75.0%)           | 4,346/6,227 (69.8%)         | <.001   |
| Diabetes                                              | 822/2,261 (36.4%)             | 2,353/6,256 (37.6%)         | 0.29    |
| Prior Myocardial Infarction                           | 259/2,233 (11.6%)             | 1,096/6,187 (17.7%)         | <.001   |
| Cigarette Smoking                                     |                               |                             |         |
| Never Smoked                                          | 1,532/2,200 (69.6%)           | 2,370/6,077 (39.0%)         | <.001   |
| Former Smoker                                         | 481/2,200 (21.9%)             | 2,847/6,077 (46.8%)         |         |
| Current Smoker                                        | 187/2,200 (8.5%)              | 860/6,077 (14.2%)           |         |
| <b>Lab Values</b>                                     |                               |                             |         |
| eGFR from Enrollment (mL/min)<br>Median (25th, 75th)  | 79 (66, 94)                   | 83 (71, 99)                 | <.001   |
| Type of Stress Test Performed                         |                               |                             |         |
| Stress Imaging Performed                              | 1,624/2,262 (71.8%)           | 4,316/6,255 (69.0%)         | 0.01    |
| Nuclear Performed                                     | 928/2,262 (41.0%)             | 2,915/6,255 (46.6%)         | <.001   |
| Echo Performed                                        | 598/2,262 (26.4%)             | 1,186/6,255 (19.0%)         | <.001   |
| CMR Performed                                         | 98/2,262 (4.3%)               | 215/6,255 (3.4%)            | 0.05    |
| Exercise Tolerance Test (ETT)<br>Performed            | 638/2,262 (28.2%)             | 1,939/6,255 (31.0%)         | 0.01    |
| <b>Qualifying Stress Test Core Lab Interpretation</b> |                               |                             |         |
| Ischemia Severity by Imaging Modality                 |                               |                             |         |
| Stress Imaging                                        |                               |                             |         |
| Severity                                              |                               |                             | <.001   |
| Severe                                                | 552/1,609 (34.3%)             | 1,726/4,267 (40.4%)         |         |
| Moderate                                              | 596/1,609 (37.0%)             | 1,582/4,267 (37.1%)         |         |
| Mild                                                  | 263/1,609 (16.3%)             | 550/4,267 (12.9%)           |         |

| <b>Characteristic</b>         | <b>Enrolled Women<br/>(N = 2,262)</b> | <b>Enrolled Men<br/>(N = 6,256)</b> | <b>P-value</b> |
|-------------------------------|---------------------------------------|-------------------------------------|----------------|
| None                          | 198/1,609 (12.3%)                     | 409/4,267 (9.6%)                    |                |
| Exercise Tolerance Test (ETT) |                                       |                                     |                |
| <i>Severity</i>               |                                       |                                     | <.001          |
| Severe                        | 382/551 (69.3%)                       | 1,333/1,726 (77.2%)                 |                |
| Moderate                      | 98/551 (17.8%)                        | 247/1,726 (14.3%)                   |                |
| Mild                          | 33/551 (6.0%)                         | 76/1,726 (4.4%)                     |                |
| None                          | 38/551 (6.9%)                         | 70/1,726 (4.1%)                     |                |
| Nuclear                       |                                       |                                     |                |
| <i>Severity</i>               |                                       |                                     | <.001          |
| Severe                        | 194/917 (21.2%)                       | 982/2,881 (34.1%)                   |                |
| Moderate                      | 391/917 (42.6%)                       | 1,197/2,881 (41.5%)                 |                |
| Mild                          | 182/917 (19.8%)                       | 384/2,881 (13.3%)                   |                |
| None                          | 150/917 (16.4%)                       | 318/2,881 (11.0%)                   |                |
| Echo                          |                                       |                                     |                |
| <i>Severity</i>               |                                       |                                     | 0.34           |
| Severe                        | 294/595 (49.4%)                       | 632/1,172 (53.9%)                   |                |
| Moderate                      | 187/595 (31.4%)                       | 313/1,172 (26.7%)                   |                |
| Mild                          | 72/595 (12.1%)                        | 146/1,172 (12.5%)                   |                |
| None                          | 42/595 (7.1%)                         | 81/1,172 (6.9%)                     |                |
| CMR                           |                                       |                                     |                |
| <i>Severity</i>               |                                       |                                     | 0.31           |
| Severe                        | 64/97 (66.0%)                         | 112/214 (52.3%)                     |                |
| Moderate                      | 18/97 (18.6%)                         | 72/214 (33.6%)                      |                |
| Mild                          | 9/97 (9.3%)                           | 20/214 (9.3%)                       |                |
| None                          | 6/97 (6.2%)                           | 10/214 (4.7%)                       |                |

CCTA = coronary CT angiography; CMR = stress cardiac magnetic resonance imaging

**eTable 2.** Functional Capacity According to Imaging Modality by Sex among Randomized Participants

| Characteristic                               | Randomized Women<br>(N=1,168) | Randomized Men<br>(N=4,011) | P-value |
|----------------------------------------------|-------------------------------|-----------------------------|---------|
| <b>Exercise with or without Imaging</b>      |                               |                             |         |
| Peak METs Achieved                           | N=541                         | N=2,307                     | <.001   |
| Median (25th, 75th)                          | 6 (5, 8)                      | 7 (6, 9)                    |         |
| % MPHR Maximal Predicted Heart Rate Achieved | N=478                         | N=2,113                     | <.001   |
| Median (25th, 75th)                          | 1.01 (0.93, 1.11)             | 0.99 (0.89, 1.07)           |         |
| <b>ETT Only</b>                              |                               |                             |         |
| Peak METs Achieved                           | N=226                         | N=984                       | <.001   |
| Median (25th, 75th)                          | 6 (5, 7)                      | 7 (6, 8)                    |         |
| % MPHR Maximal Predicted Heart Rate Achieved | N=226                         | N=986                       | <.001   |
| Median (25th, 75th)                          | 1.00 (0.92, 1.09)             | 0.97 (0.87, 1.06)           |         |
| <b>Exercise Nuclear</b>                      |                               |                             |         |
| Peak METs Achieved                           | N=143                         | N=790                       | <.001   |
| Median (25th, 75th)                          | 6 (5, 8)                      | 8 (6, 10)                   |         |
| % MPHR Maximal Predicted Heart Rate Achieved | N=96                          | N=623                       | 0.001   |
| Median (25th, 75th)                          | 0.96 (0.80, 1.03)             | 1.00 (0.90, 1.07)           |         |
| <b>Exercise Echo</b>                         |                               |                             |         |
| Peak METs Achieved                           | N=171                         | N=533                       | <.001   |
| Median (25th, 75th)                          | 6 (5, 8)                      | 8 (6, 9)                    |         |
| % MPHR Maximal Predicted Heart Rate Achieved | N=155                         | N=504                       | <.001   |
| Median (25th, 75th)                          | 1.07 (0.99, 1.16)             | 1.02 (0.94, 1.12)           |         |
| <b>Combined Exercise Nuclear + Echo</b>      |                               |                             |         |
| Peak METs Achieved                           | N=314                         | N=1,323                     | <.001   |
| Median (25th, 75th)                          | 6 (5, 8)                      | 8 (6, 10)                   |         |
| % MPHR Maximal Predicted Heart Rate Achieved | N=251                         | N=1,127                     | 0.03    |
| Median (25th, 75th)                          | 1.03 (0.95, 1.13)             | 1.01 (0.92, 1.08)           |         |

There was no difference between the sexes in Duke Treadmill Score.

**eTable 3.** Extent of CAD by Sex among Enrolled Participants Undergoing Coronary CT Angiography with Core Lab-Verified Moderate-Severe Ischemia<sup>†</sup>

| Characteristic                                                                                                                 | Women with Core Lab-Verified Moderate-Severe Ischemia (N=692) | Men with Core Lab-Verified Moderate-Severe Ischemia (N=2,705) | P-value |
|--------------------------------------------------------------------------------------------------------------------------------|---------------------------------------------------------------|---------------------------------------------------------------|---------|
| No. Diseased Vessels ≥50% Stenosis by CCTA                                                                                     |                                                               |                                                               | <.001   |
| 0                                                                                                                              | 0/490 (0.0%)                                                  | 1/2,134 (0.0%)                                                |         |
| 1                                                                                                                              | 154/490 (31.4%)                                               | 453/2,134 (21.2%)                                             |         |
| 2                                                                                                                              | 160/490 (32.7%)                                               | 669/2,134 (31.3%)                                             |         |
| ≥3                                                                                                                             | 176/490 (35.9%)                                               | 1,011/2,134 (47.4%)                                           |         |
| Left Main ≥50% Stenosis by CCTA                                                                                                | 1/680 (0.1%)                                                  | 11/2,665 (0.4%)                                               | 0.48    |
| No. Diseased Vessels ≥70% Stenosis by CCTA                                                                                     |                                                               |                                                               | <.001   |
| 0                                                                                                                              | 64/417 (15.3%)                                                | 175/1,822 (9.6%)                                              |         |
| 1                                                                                                                              | 198/417 (47.5%)                                               | 715/1,822 (39.2%)                                             |         |
| 2                                                                                                                              | 100/417 (24.0%)                                               | 557/1,822 (30.6%)                                             |         |
| ≥3                                                                                                                             | 55/417 (13.2%)                                                | 375/1,822 (20.6%)                                             |         |
| Left Main ≥70% Stenosis by CCTA                                                                                                | 0/680 (0.0%)                                                  | 1/2,665 (0.0%)                                                | >0.99   |
| Segment Stenosis Score                                                                                                         | N=490                                                         | N=2,134                                                       |         |
| Median (25th, 75th)                                                                                                            | 22 (17, 27)                                                   | 25 (20, 31)                                                   | <.001   |
| Segment Involvement Score                                                                                                      | N=490                                                         | N=2,134                                                       |         |
| Median (25th, 75th)                                                                                                            | 11 (9, 13)                                                    | 12 (10, 13)                                                   | <.001   |
| <sup>†</sup> Excludes participants with prior coronary artery bypass grafting. CCTA= coronary computed tomographic angiography |                                                               |                                                               |         |

**eTable 4. Randomized Participant Baseline Medications by Sex**

| Medication                                              | Randomized Women<br>(N=1,168) | Randomized Men<br>(N=4,011) | P-value |
|---------------------------------------------------------|-------------------------------|-----------------------------|---------|
| Anti-platelet Medications                               | 1,085/1,168 (92.9%)           | 3,787/4,007 (94.5%)         | 0.04    |
| Aspirin                                                 | 1,036/1,168 (88.7%)           | 3,611/4,007 (90.1%)         | 0.16    |
| Clopidogrel                                             | 289/1,168 (24.7%)             | 1,056/4,007 (26.4%)         | 0.27    |
| Other <sup>1</sup>                                      | 25/1,168 (2.1%)               | 93/4,007 (2.3%)             | 0.72    |
| Anticoagulant Medications                               | 39/1,158 (3.4%)               | 164/3,973 (4.1%)            | 0.24    |
| Warfarin                                                | 20/1,158 (1.7%)               | 86/3,973 (2.2%)             | 0.36    |
| Dabigatran, Apixaban, Rivaroxaban                       | 18/1,158 (1.6%)               | 72/3,973 (1.8%)             | 0.56    |
| Other <sup>2</sup>                                      | 1/1,158 (0.1%)                | 7/3,973 (0.2%)              | 0.69    |
| Anti-platelet or Anticoagulant Medications              | 1,106/1,167 (94.8%)           | 3,872/4,007 (96.6%)         | 0.003   |
| Statins                                                 | 1,087/1,168 (93.1%)           | 3,817/4,006 (95.3%)         | 0.003   |
| <i>Statin Type</i>                                      |                               |                             | 0.10    |
| Rosuvastatin                                            | 263/1,168 (22.5%)             | 905/4,006 (22.6%)           |         |
| Atorvastatin                                            | 639/1,168 (54.7%)             | 2,311/4,006 (57.7%)         |         |
| Simvastatin                                             | 158/1,168 (13.5%)             | 493/4,006 (12.3%)           |         |
| Other                                                   | 108/1,168 (9.2%)              | 297/4,006 (7.4%)            |         |
| High-Intensity Statin <sup>3</sup>                      |                               |                             | <.001   |
| Yes                                                     | 377/1,168 (32.3%)             | 1,534/4,006 (38.3%)         |         |
| No/Unknown Dose                                         | 791/1,168 (67.7%)             | 2,472/4,006 (61.7%)         |         |
| Ezetimibe                                               | 55/1,168 (4.7%)               | 157/4,007 (3.9%)            | 0.23    |
| Fibrate                                                 | 33/1,168 (2.8%)               | 114/4,007 (2.8%)            | 0.97    |
| Fish Oil                                                | 29/1,168 (2.5%)               | 162/4,007 (4.0%)            | 0.01    |
| Other Lipid Lowering Medication <sup>4</sup>            | 5/1,168 (0.4%)                | 32/4,007 (0.8%)             | 0.19    |
| Anti-Hypertensive and Anti-Ischemic/Anginal Medications | 1,130/1,168 (96.7%)           | 3,887/4,007 (97.0%)         | 0.65    |
| Beta Blocker                                            | 940/1,168 (80.5%)             | 3,221/4,007 (80.4%)         | 0.94    |
| Calcium Channel Blocker                                 | 382/1,168 (32.7%)             | 1,196/4,007 (29.8%)         | 0.06    |
| ACE Inhibitor                                           | 425/1,168 (36.4%)             | 1,716/4,007 (42.8%)         | <.001   |
| Angiotensin Receptor Blocker (ARB)                      | 373/1,168 (31.9%)             | 933/4,007 (23.3%)           | <.001   |
| ACE Inhibitor or ARB                                    | 788/1,168 (67.5%)             | 2,628/4,007 (65.6%)         | 0.23    |
| Aldosterone Antagonist                                  | 31/1,168 (2.7%)               | 84/4,007 (2.1%)             | 0.26    |
| Diuretic                                                | 315/1,168 (27.0%)             | 767/4,007 (19.1%)           | <.001   |
| Alpha 1 Blocker                                         | 23/1,168 (2.0%)               | 161/4,007 (4.0%)            | <.001   |
| Long-acting Nitrate                                     | 390/1,168 (33.4%)             | 1,285/4,007 (32.1%)         | 0.40    |
| Ranolazine                                              | 55/1,168 (4.7%)               | 204/4,007 (5.1%)            | 0.60    |
| Trimetazidine                                           | 60/1,168 (5.1%)               | 185/4,007 (4.6%)            | 0.46    |
| Ivabradine                                              | 15/1,168 (1.3%)               | 45/4,007 (1.1%)             | 0.65    |
| Nicorandil                                              | 32/1,168 (2.7%)               | 138/4,007 (3.4%)            | 0.24    |
| Other <sup>5</sup>                                      | 18/1,168 (1.5%)               | 47/4,007 (1.2%)             | 0.32    |

| Medication                                                                                                                                                                                                                                                                                                                                                                                                                                                                                                                                                                                                                                                                                                                                                                                                                                                                | Randomized Women<br>(N=1,168) | Randomized Men<br>(N=4,011) | P-value |
|---------------------------------------------------------------------------------------------------------------------------------------------------------------------------------------------------------------------------------------------------------------------------------------------------------------------------------------------------------------------------------------------------------------------------------------------------------------------------------------------------------------------------------------------------------------------------------------------------------------------------------------------------------------------------------------------------------------------------------------------------------------------------------------------------------------------------------------------------------------------------|-------------------------------|-----------------------------|---------|
| <p><sup>1</sup>Includes Ticlopidine, Prasugrel, Ticagrelor, Cilostazol, and other anti-platelet medications, including types classified as "Unknown".</p> <p><sup>2</sup>Includes anticoagulant medications such as Enoxaparin and Dalteparin as well as types classified as "Unknown".</p> <p><sup>3</sup>High-intensity dose of Rosuvastatin or Atorvastatin at the randomization visit. A "No/Unknown Dose" includes Not Applicable, Unknown, and null responses.</p> <p><sup>4</sup>Includes medications such as Saroglitazar and Ranozex as well as medications classified as "Unknown". In addition, products such as red yeast rice and flax seed oil are also included.</p> <p><sup>5</sup>Includes medications such as Renin Inhibitors, Hydralazine, Moxonidine as well as anti-hypertensive and anti-ischemic/anginal medications classified as "Unknown".</p> |                               |                             |         |

**eTable 5.** Vital Signs, Laboratory Values and Functional Status by Sex among Randomized Participants

| Characteristic                             | Randomized Women<br>(N=1,168) | Randomized Men<br>(N=4,011) | P-value |
|--------------------------------------------|-------------------------------|-----------------------------|---------|
| <b>Vital Signs</b>                         |                               |                             |         |
| Heart Rate (bpm)                           | N=1,162                       | N=3,984                     |         |
| Median (25th, 75th)                        | 68 (61, 76)                   | 67 (60, 75)                 | <.001   |
| Blood Pressure (mmHg)                      | N=1,164                       | N=3,986                     |         |
| Systolic Median (25th, 75th)               | 130 (120, 145)                | 130 (120, 142)              | 0.02    |
| Diastolic Median (25th, 75th)              | 75 (70, 80)                   | 78 (70, 82)                 | <.001   |
| Body Mass Index (BMI) (kg/m <sup>2</sup> ) | N=1,160                       | N=3,964                     |         |
| Median (25th, 75th)                        | 28.2 (25.0, 32.5)             | 27.6 (24.9, 31.0)           | <.001   |
| <b>Lab Values</b>                          |                               |                             |         |
| Total Cholesterol (mg/dL)                  | N=1,143                       | N=3,931                     |         |
| Median (25th, 75th)                        | 166.7 (141.1, 203.4)          | 150.0 (127.0, 181.0)        | <.001   |
| Triglycerides (mg/dL)                      | N=1,125                       | N=3,859                     |         |
| Median (25th, 75th)                        | 126.0 (97.0, 174.3)           | 123.9 (89.4, 177.0)         | 0.10    |
| HDL Cholesterol (mg/dL)                    | N=1,134                       | N=3,889                     |         |
| Median (25th, 75th)                        | 48.0 (41.0, 58.0)             | 41.4 (35.0, 49.0)           | <.001   |
| LDL Cholesterol (mg/dL)                    | N=1,116                       | N=3,824                     |         |
| Median (25th, 75th)                        | 90.9 (69.0, 120.5)            | 81.0 (61.9, 107.0)          | <.001   |
| HbA1c for Diabetics (%)                    | N=478                         | N=1,523                     |         |
| Median (25th, 75th)                        | 7.5 (6.6, 8.7)                | 7.2 (6.5, 8.2)              | <.001   |
| Hemoglobin (g/dL)                          | N=1,107                       | N=3,780                     |         |
| Median (25th, 75th)                        | 13.0 (12.2, 13.9)             | 14.3 (13.4, 15.2)           | <.001   |
| Estimated GFR from Enrollment (mL/min)     | N=1,168                       | N=4,011                     |         |
| Median (25th, 75th)                        | 76 (61, 92)                   | 83 (69, 98)                 | <.001   |

**eTable 6. Study Personnel**

| Country (No. Randomizations) | Investigator(s)             | Study Coordinator(s)          | City & State (if applicable) | Institution (No. Randomizations)                  |
|------------------------------|-----------------------------|-------------------------------|------------------------------|---------------------------------------------------|
| *United States (853)         |                             |                               |                              |                                                   |
| Country Leader               |                             |                               |                              |                                                   |
| David J. Maron, MD           |                             |                               |                              |                                                   |
| Regional Leader for VA Sites |                             |                               |                              |                                                   |
| William E. Boden, MD         |                             |                               |                              |                                                   |
|                              | Kreton Mavromatis, MD       | John Doan, MD                 | Decatur, GA                  | Atlanta VA Medical Center (139)                   |
|                              | Jason Linefsky, MD          | Raven Lee, CCRP               |                              |                                                   |
|                              |                             | Risha Patel                   |                              |                                                   |
|                              | Todd Miller, MD             | So Yang Cho                   | Rochester, MN                | Mayo Clinic (50)                                  |
|                              |                             | Susan Milbrandt               |                              |                                                   |
|                              |                             | Dawn Shelstad                 |                              |                                                   |
|                              | Subhash Banerjee, MD        | Preeti Kamath, BDS, MHA, CCRP | Dallas, TX                   | V.A. North Texas Health Care System (35)          |
|                              |                             | Ishita Tejani, BDS, MS, MSPH  |                              |                                                   |
|                              | Harmony R. Reynolds, MD     | Stanley E. Cobos, BA          | New York, NY                 | NYU Langone Medical Center-Bellevue Hospital (26) |
|                              | Jonathan D. Newman, MD, MPH | Kirsten J. Quiles, MS         |                              |                                                   |
|                              | Sripal Bangalore, MD        | Raven R. Dwyer, MPH           |                              |                                                   |
|                              | Robert M. Donnino, MD       | Dalisa Espinosa, MBS          |                              |                                                   |
|                              | Lawrence M. Phillips, MD    |                               |                              |                                                   |
|                              | Muhamed Saric, MD, PhD      |                               |                              |                                                   |
|                              |                             | Allison Schley, BS            | Detroit, MI                  |                                                   |

|  |                                                 |                        |                 |                                                         |
|--|-------------------------------------------------|------------------------|-----------------|---------------------------------------------------------|
|  | Khaled Abdul-Nour, MD                           | Heather Golden         |                 | Henry Ford Health System (21)                           |
|  | Peter H. Stone, MD                              | Hermine Osseni, MS     | Boston, MA      | Brigham & Women's Hospital, Harvard Medical School (21) |
|  |                                                 | Charlene Wiyarand      |                 |                                                         |
|  |                                                 | Peter Douglass, BA     |                 |                                                         |
|  |                                                 | Hayley Pomeroy, BA     |                 |                                                         |
|  |                                                 | Alexandra Craft, BA    |                 |                                                         |
|  |                                                 | Bethany Harvey, BA     |                 |                                                         |
|  | James J. Jang, MD                               | Olivia Anaya           | San Jose, CA    | Kaiser Permanente San Jose (18)                         |
|  | Gennie Yee, MD                                  | Phoebe Goold, RN       |                 |                                                         |
|  | Steven Weitz, MD                                | Steven Giovannone      | Schenectady, NY | Cardiology Associates of Schenectady P.C. (17)          |
|  |                                                 | Lori Pritchard, RN     |                 |                                                         |
|  | Suzanne Arnold, MD                              | Rosann Gans, RN        | Kansas City, MO | Saint Luke's Hospital (17)                              |
|  | James Henry O'Keefe, Jr, MD (PI from 2012-2016) | Paul Kennedy, RN       |                 |                                                         |
|  | Michael D. Shapiro, DO                          | Shobana Ganesan, PhD   | Portland, OR    | Oregon Health & Science University (17)                 |
|  |                                                 | David Schlichting, LPN |                 |                                                         |
|  |                                                 | Aynun Naher            |                 |                                                         |
|  | Mohammad El-Hajjar, MD                          |                        | Albany, NY      | Albany Medical Center Hospital (16)                     |
|  | Mandeep S. Sidhu, MD, MBA                       |                        |                 |                                                         |
|  | Steven A. Fein, MD                              | Wendy L. Stewart, MS   |                 |                                                         |
|  | Mikhail T. Torosoff, MD, PhD                    | Kristin M. Salmi, BS   |                 |                                                         |
|  | Radmila Lyubarova, MD                           |                        |                 |                                                         |
|  | Sulagna Mookherjee, MD                          |                        |                 |                                                         |
|  | Krzysztof Drzymalski, MD                        |                        |                 |                                                         |
|  | Edward O. McFalls, MD, PhD                      |                        | Minneapolis, MN | Minneapolis VAMC (15)                                   |

|  |                              |                          |                 |                                                             |
|--|------------------------------|--------------------------|-----------------|-------------------------------------------------------------|
|  | Santiago A. Garcia, MD       |                          |                 |                                                             |
|  | Stefan C. Bertog, MD         | Debra K. Johnson, RN     |                 |                                                             |
|  | Rizwan A. Siddiqui, MD       | Rebekah R. Herrmann, RN  |                 |                                                             |
|  | Areef Ishani, MD             |                          |                 |                                                             |
|  | Ronnell A. Hansen, MD        |                          |                 |                                                             |
|  | Michel Georges Khouri, MD    | Kristine Arges           | Durham, NC      | Duke University Medical Center (15)                         |
|  |                              | Melissa LeFevre          |                 |                                                             |
|  |                              | Jennifer Tomfohr         |                 |                                                             |
|  | Jonathan L. Goldberg, MS, MD | Kimberly Ann Byrne       | Cleveland, OH   | Louis Stokes Cleveland Veterans Affairs Medical Center (14) |
|  |                              | Taissa Zappernick        |                 |                                                             |
|  | Richard Goldweit, MD         | Sallie Canada            | Englewood, NJ   | Englewood Hospital and Medical Center (13)                  |
|  |                              | Meghana Kakade           |                 |                                                             |
|  |                              | Patricia Miseses         |                 |                                                             |
|  |                              | Stanley E. Cobos, BA     | Brooklyn, NY    | NYU-HHC Woodhull Hospital (12)                              |
|  |                              | Raven R. Dwyer, MPH      |                 |                                                             |
|  | Ronny A. Cohen, MD           | Dalisa Espinosa, MBS     |                 |                                                             |
|  | Brooks Mirrer, MD            | Kirsten J. Quiles, MS    |                 |                                                             |
|  | Victor Navarro, MD           | Magdalena Rantinella, BS |                 |                                                             |
|  |                              | Jessica Rodriguez, BS    |                 |                                                             |
|  |                              | Olivia Mancilla, BS      |                 |                                                             |
|  | David E. Winchester, MD, MS  | Susan Stinson, RN        | Gainesville, FL | Malcom Randall VAMC (11)                                    |
|  | Marvin Kronenberg, MD        | Terry Weyand             | Nashville, TN   | Vanderbilt University Medical Center (11)                   |
|  | Philip Rogal, MD             | Sherron C. Crook         |                 |                                                             |
|  | Christopher McFarren, MD     |                          |                 |                                                             |
|  | John F. Heitner, MD          | Jean Ho                  | Brooklyn, NY    |                                                             |
|  |                              | Saadat Khan              |                 |                                                             |

|  |                               |                       |                   |                                                          |
|--|-------------------------------|-----------------------|-------------------|----------------------------------------------------------|
|  |                               | Mahmoud Mohamed       |                   | New York - Presbyterian/Brooklyn Methodist Hospital (10) |
|  | Ira M. Dauber, MD             | Mary R. Soltau, RN    | Littleton, CO     | South Denver Cardiology Associates, P.C. (10)            |
|  |                               | Delsa K. Rose, RN     |                   |                                                          |
|  |                               | Rebecca J. Wimmer, RN |                   |                                                          |
|  |                               | Kathy E. Siegel, RN   |                   |                                                          |
|  |                               | Susan Derbyshire      |                   |                                                          |
|  | Charles Cannan, MD            | Michelle Dixon        | Portland, OR      | Providence Heart and Vascular Institute (10)             |
|  |                               | Gerald Leonard        |                   |                                                          |
|  | Sriram Sudarshan, MD          | Ciarra Heard, LVN     | Wichita Falls, TX | Wichita Falls Heart Clinic (9)                           |
|  |                               | Viviana Gabriel, LVN  |                   |                                                          |
|  |                               | Sukie Desire          |                   |                                                          |
|  | Puja K. Mehta, MD             |                       | Atlanta, GA       | Emory University (9)                                     |
|  | Michael McDaniel, MD          | Fauzia Rashid, PhD    |                   |                                                          |
|  | Stamatios Lerakis, MD         | Senait Asier          |                   |                                                          |
|  | Arshed Quyyumi, MD            | Keyur Patel           |                   |                                                          |
|  | Nanette K. Wenger, MD         |                       |                   |                                                          |
|  | Chester M. Hedgepeth, MD, PhD | Jennifer Gillis, APRN | Warwick, RI       | Kent Hospital (9)                                        |
|  | Heather Hurlburt, MD          | Megan Manocchia, RN   |                   |                                                          |
|  | Alan Rosen, MD                | Susan Moore, RN       |                   |                                                          |
|  |                               | Elizabeth Congdon     |                   |                                                          |
|  | Zakir Sahul, MD               | Gail Brandt           | Ypsilanti, MI     | Michigan Heart, PC (9)                                   |
|  |                               | Nora Marchelletta     |                   |                                                          |
|  |                               | Kristina Wippler      |                   |                                                          |
|  | David Booth, MD               | Yvonne Taul, RN       | Lexington, KY     | University of Kentucky (8)                               |
|  | Steve Leung, MD               | Jennifer Isaacs, MS   |                   |                                                          |

|  |                                        |                             |                 |                                                    |
|--|----------------------------------------|-----------------------------|-----------------|----------------------------------------------------|
|  | Ahmed Abdel-Latif, MD, PhD             | Viktoria Bulkley, RN        |                 |                                                    |
|  | Hassan Reda, MD                        | Caroline Rodgers            |                 |                                                    |
|  | Khaled Ziada, MD                       |                             |                 |                                                    |
|  | Sampoornima Setty, MD                  | Kimberly E. Halverson, RHIT | La Crosse, WI   | Gundersen Lutheran Medical Center (8)              |
|  |                                        | Christine Roraff, RN        |                 |                                                    |
|  |                                        | Jonean Thorsen, RN          |                 |                                                    |
|  | Rajat S. Barua, MD, PhD                | Amarachi Ojajuni            | Kansas City, MO | Kansas City VA Medical Center (8)                  |
|  |                                        | Oni Olurinde                |                 |                                                    |
|  |                                        | Kamalakar Surineni          |                 |                                                    |
|  | Fadi Hage, MD                          | Badhma Valaiyapathi, MD     | Birmingham, AL  | UAB Vascular Biology and Hypertension Program (8)  |
|  | Christiano Caldeira, MD                |                             |                 |                                                    |
|  | James E. Davies, MD                    |                             |                 |                                                    |
|  | Massoud Leesar, MD                     |                             |                 |                                                    |
|  | Jaekyeong Heo, MD                      |                             |                 |                                                    |
|  | Amy Iskandrian, MD                     |                             |                 |                                                    |
|  | Firas Al Solaiman, MD                  |                             |                 |                                                    |
|  | Satinder Singh, MD                     |                             |                 |                                                    |
|  | Khaled Dajani, MD                      | Carol M. Kartje, BSN        | Maywood, IL     | Loyola University Medical Center (8)               |
|  | Mohammad El-Hajjar, MD                 |                             | Albany, NY      | Samuel Stratton VA Medical Center of Albany NY (7) |
|  | Paul Der Mesropian, MD                 |                             |                 |                                                    |
|  | Joseph Sacco, MD                       | Michele Rawlins, NP         |                 |                                                    |
|  | Brian McCandless, MD                   | Jennifer Thomson, MA        |                 |                                                    |
|  | Marisa Orgera, MD                      |                             |                 |                                                    |
|  | Mandeep S. Sidhu, MD, MBA (2012-2016 ) |                             |                 |                                                    |

|  |                                |                                   |                          |                                                        |
|--|--------------------------------|-----------------------------------|--------------------------|--------------------------------------------------------|
|  |                                | Mary Colleen Rogge, RN            | Cincinnati, OH           | Cincinnati VA Medical Center (7)                       |
|  | Imran Arif, MD                 | Julie Bunke , BA                  |                          |                                                        |
|  | Hanan Kerr, MD                 | Kendra Unterbrink , PA            |                          |                                                        |
|  |                                | Jacqueline Fannon, RN             |                          |                                                        |
|  |                                | Cynthia Burman, NP                |                          |                                                        |
|  | Jorge F. Trejo (Gutierrez), MD | Marcia F. Dubin, CCRP             | Jacksonville, FL         | Mayo Clinic Florida (7)                                |
|  | Gerald Fletcher, MD            |                                   |                          |                                                        |
|  | Gary E. Lane, MD               |                                   |                          |                                                        |
|  | Lynn M. Neeson, DNP            |                                   |                          |                                                        |
|  | Pragnesh P. Parikh, MD         |                                   |                          |                                                        |
|  | Peter M. Pollak, MD            |                                   |                          |                                                        |
|  | Brian P. Shapiro, MD           |                                   |                          |                                                        |
|  | Kevin Landolfo, MD             |                                   |                          |                                                        |
|  | Anthony Gemignani, MD          | Sarah Beaudry, RN                 | White River Junction, VT | VAMC-White River Junction (7)                          |
|  | Daniel O'Rourke, MD            |                                   |                          |                                                        |
|  | Judith L. Meadows, MD          | Stephanie A. Tirado, RN           | West Haven, CT           | VA Connecticut Healthcare System (7)                   |
|  |                                | Janet Halliday                    |                          |                                                        |
|  |                                | Pamela Julian                     |                          |                                                        |
|  | Jason T. Call, MD              | Stephanie, M. Lane, RN, BSN, CCRN | Winchester, VA           | Winchester Cardiology and Vascular Medicine, PC (7)    |
|  |                                | Jennifer L. Stanford, RN, MSN     |                          |                                                        |
|  | Joseph Hannan, MD              | Patricia Arsenault, RN            | Worcester, MA            | Saint Vincent Hospital at Worcester Medical Center (7) |
|  | Robert Bojar, MD               |                                   |                          |                                                        |
|  | Deepti Kumar, MD               |                                   |                          |                                                        |

|  |                          |                          |                   |                                             |
|--|--------------------------|--------------------------|-------------------|---------------------------------------------|
|  | John Mukai, MD           |                          |                   |                                             |
|  | Edward T. Martin, MS, MD | Miriam Brooks            | Tulsa, OK         | Oklahoma Heart Institute (7)                |
|  | Gabriel Vorobiof, MD     | Ladda Douangvila         | Los Angeles, CA   | Ronald Reagan UCLA Medical Center (7)       |
|  |                          | Rubine Gevorgyan         |                   |                                             |
|  | Alec Moorman, MD         | Fatima Ranjbaran, RN     | Seattle, WA       | University of Washington Medical Center (7) |
|  |                          | Bryn Smith, BS           |                   |                                             |
|  |                          | Carly Ohmart             |                   |                                             |
|  | Scott Kinlay, MBBS, PhD  |                          | West Roxbury, MA  | VA Boston Healthcare System (6)             |
|  | Robert J. Hamburger, MD  |                          |                   |                                             |
|  | Thomas P. Rocco, MD      | Samantha Ly, MA          |                   |                                             |
|  | Deepak L. Bhatt, MD, MPH | Margot C. Quinn, BA      |                   |                                             |
|  | Kevin Croce, MD, PhD     | Sara Temiyasathit, PhD   |                   |                                             |
|  | Jacquelyn A Quin, MD     | Jacquelyn Do, MPH        |                   |                                             |
|  | Jati Anumpa, MD          | Desiree Tobin, MPH       |                   |                                             |
|  | Marco Zenati, MD, MSc    |                          |                   |                                             |
|  | David P Faxon, MD        |                          |                   |                                             |
|  | Glenn Rayos, MD          | Jennifer Langdon         | Daytona Beach, FL | Daytona Heart Group (6)                     |
|  |                          | Marcia Werner Bayer      |                   |                                             |
|  | Ashraf Seedhom, MD       | Amanda O'Malley          | Albany, NY        | Capital Cardiology Associates (6)           |
|  | Lance Sullenberger, MD   | Erin Orvis               |                   |                                             |
|  | Gregory Kumkumian, MD    | Mandy Murphy, RN         | Bethesda, MD      | NIH Heart Center at Suburban Hospital (6)   |
|  |                          | Ann Greenberg, RN        |                   |                                             |
|  |                          | Margaret Iraola, RN      |                   |                                             |
|  | Steven P. Sedlis, MD     | Leandro C. Maranan, CCRC | New York, NY      | VA New York Harbor Health Care System (6)   |

|  |                                 |                                |                     |                                                        |
|--|---------------------------------|--------------------------------|---------------------|--------------------------------------------------------|
|  | Robert M. Donnino, MD           |                                |                     |                                                        |
|  | Jeffrey Lorin, MD               |                                |                     |                                                        |
|  | Jacqueline E. Tamis-Holland, MD | Ammy Malinay, RN               | Ridgewood, NJ       | Mount Sinai Saint Luke's Hospital (6)                  |
|  | Robert Kornberg, MD             |                                |                     |                                                        |
|  | Robert Leber, MD                |                                |                     |                                                        |
|  | Souheil Saba, MD                | Candice P. Edillo, RN          | Southfield, MI      | Providence - Providence Park Hospital (6)              |
|  | Michael W. Lee, MD              |                                |                     |                                                        |
|  | Delano R. Small, MD             |                                |                     |                                                        |
|  | Wassim Nona, MD                 |                                |                     |                                                        |
|  | Patrick B. Alexander, MD        |                                |                     |                                                        |
|  | Iram Rehman, MD                 |                                |                     |                                                        |
|  | Umesh Badami, MD                | Ann Ostrander, RN              | Saginaw, MI         | Covenant Medical Center, Inc. (5)                      |
|  |                                 | Stephanie Wasmiller, RN        |                     |                                                        |
|  | Kevin Marzo, MD                 | Wendy Drewes, RN               | Mineola, NY         | NYU Winthrop (5)                                       |
|  |                                 | Dipti Patel, RN                |                     |                                                        |
|  | Inga H. Robbins, MD             |                                | Pomona, NJ          | AtlantiCare Regional Medical Center (5)                |
|  | Howard A. Levite, MD            | Jackie M White, RN, BSN CCRC   |                     |                                                        |
|  | Sanjay Shetty, MD               | Alison Hallam                  |                     |                                                        |
|  | Mayuri Patel, MD                |                                |                     |                                                        |
|  | Glenn S. Hamroff, MD            | Benjamin J Spooner, RPA-C      | Cortlandt Manor, NY | NYP Medical Medical Group Hudson Valley Cardiology (5) |
|  |                                 | Linda M Hollenweger, LPN, CCRC |                     |                                                        |
|  | Raymond W. Little, MD           | Holly Little                   | Houston, TX         | Houston Heart & Vascular Associates (5)                |
|  | Brandi D. Zimbelman, FNP-C      | Tiffany Little                 |                     |                                                        |
|  | Charles Y. Lui, MD              | Nona A Eskelson, RN            | Salt Lake City, UT  |                                                        |

|  |                               |                                |               |                                                     |
|--|-------------------------------|--------------------------------|---------------|-----------------------------------------------------|
|  | Brigham R. Smith, MD          |                                |               | Salt Lake City VA Medical Center (4)                |
|  | Daniel P. Vezina, MD, MSC     |                                |               |                                                     |
|  | Lillian L. Khor, MBBCh, MSc   |                                |               |                                                     |
|  | Josephine D. Abraham, MD, MPH |                                |               |                                                     |
|  | David A. Bull, MD             |                                |               |                                                     |
|  | Stephen H. McKellar, MD, MSc  |                                |               |                                                     |
|  | David Booth, MD               | Yvonne Taul, RN                | Lexington, KY | Lexington VA Medical Center (4)                     |
|  | John Kotter, MD               | Caroline Rodgers, RN           |               |                                                     |
|  | Ahmed Abdel-Latif, MD, PhD    | Jennifer Isaacs, MS            |               |                                                     |
|  |                               | Viktoria Bulkley               |               |                                                     |
|  | Bob Hu, MD                    | Renee Kaneshiro                | Palo Alto, CA | Palo Alto Medical Foundation Research Institute (4) |
|  | Arthur J. Labovitz, MD        |                                | Tampa, FL     | University of South Florida (4)                     |
|  | Michael Berlowitz, MD         | Bonnie J. Kirby, RN, MSN       |               |                                                     |
|  | Philip Rogal, MD              | Nhi N. Tran, MS                |               |                                                     |
|  | Christopher McFarren, MD      | Catherine Jahrsdorfer, RN, BSN |               |                                                     |
|  | Fadi Matar, MD                |                                |               |                                                     |
|  | Christiano Caldeira, MD       |                                |               |                                                     |
|  | David J. Maron, MD            |                                | Stanford, CA  | Stanford University School of Medicine (4)          |
|  | Fatima Rodriguez, MD, MPH     | Reem Yunis, PhD                |               |                                                     |
|  | Ingela Schnittger, MD         | Jhina Patro                    |               |                                                     |
|  | William F. Fearon, MD         |                                |               |                                                     |

|  |                           |                                 |                  |                                                     |
|--|---------------------------|---------------------------------|------------------|-----------------------------------------------------|
|  | Prakash Deedwania, MD     | Antonia Vega                    | Fresno, CA       | UCSF - Fresno Community Regional Medical Center (4) |
|  | Kiran Reddy, MD           |                                 |                  |                                                     |
|  | Joseph Sweeny, MD         | Hugo Bloise-Adames              | New York, NY     | Icahn School of Medicine at Mount Sinai (4)         |
|  |                           | Santa Jimenez                   |                  |                                                     |
|  |                           | Nicole Saint Vrestil            |                  |                                                     |
|  |                           | Reyna Bhandari                  |                  |                                                     |
|  | Christopher Spizzieri, MD | Danielle Schade                 | Camp Hill, PA    | Holy Spirit Hospital Cardiovascular Institute (4)   |
|  |                           | Roxanne Yost                    |                  |                                                     |
|  | Claudia P Hochberg, MD    | Paula Beardsley                 | Boston, MA       | Boston Medical Center (4)                           |
|  |                           | Denise Fine                     |                  |                                                     |
|  | William D. Salerno, MD    | Jana Tancredi, RN, MA/MSN, CCRN | Saddle Brook, NJ | Hackensack University Medical Center (4)            |
|  |                           | Patricia Arakelian              |                  |                                                     |
|  |                           | Susan Mathus                    |                  |                                                     |
|  |                           | Deborah O'Neill                 |                  |                                                     |
|  | Ray Wyman, MD             | Joy Burkhardt, CCRP             | Torrance, CA     | Torrance Memorial Medical Center (4)                |
|  |                           | Suellen Hosino, RN, BSN, CCRP   |                  |                                                     |
|  |                           |                                 |                  |                                                     |
|  |                           | Oksana A. Lubyanyaya, BA        | Santa Ana, CA    | Coastal Heart Medical Group (4)                     |
|  |                           | Jose D. Salas, BS               |                  |                                                     |
|  | Amer Zarka, MD            | Maria Aguirre                   |                  |                                                     |
|  | Anil V. Shah, MD          | Manu Dhawan                     |                  |                                                     |
|  |                           | Diana Parra                     |                  |                                                     |
|  |                           | Tri Tran                        |                  |                                                     |
|  | Thomas Haldis, DO         | Catherine Weick, BSRT(R)(VI)    | Fargo, ND        | Sanford Health (4)                                  |
|  |                           | Katie Fowler-Lehman, BSN        |                  |                                                     |
|  |                           | Natalie Spitzer, BSN            |                  |                                                     |
|  |                           | Casey Riedberger                |                  |                                                     |
|  |                           | Catherine Weick                 |                  |                                                     |

|  |                           |                              |                      |                                                    |
|--|---------------------------|------------------------------|----------------------|----------------------------------------------------|
|  | Jeffrey A. Kohn, MD       | Stanley E. Cobos, BA         | New York, NY         | NYU New York Medical Associates (4)                |
|  |                           | Raven R. Dwyer, MPH          |                      |                                                    |
|  |                           | Dalisa Espinosa, MBS         |                      |                                                    |
|  |                           | Kirsten J. Quiles, MS        |                      |                                                    |
|  | Saket Girotra, MD         | Carrie Drum, RN              | Iowa City, IA        | University of Iowa Hospitals and Clinics (4)       |
|  |                           | Kimberly Miller-Cox, RN      |                      |                                                    |
|  |                           | Amy Ollinger, RN             |                      |                                                    |
|  | Omar Almousalli, MD       | Elizabeth Capasso-Gulve      | Fairview Heights, IL | Advanced Heart Care Group (4)                      |
|  |                           | Alaine Melanie Loehr         |                      |                                                    |
|  |                           | Marlowe Mosley               |                      |                                                    |
|  | Mayil S. Krishnam, MD     | Shirin Heydari, MS           | Orange, CA           | University of California Irvine Medical Center (3) |
|  | Jeffrey C. Milliken, MD   | Andrea M. Lundeen, MA        |                      |                                                    |
|  | Pranav M. Patel, MD       | Edgar Karanjah, MD           |                      |                                                    |
|  | Arnold H. Seto, MD        | Wanda C. Marfori, MD         |                      |                                                    |
|  | Kevin T. Harley, MD       | Eduardo Hernandez-Rangel, MD |                      |                                                    |
|  | Michael A. Gibson, MD     | Pam Singh                    |                      |                                                    |
|  | Byron J. Allen, MD        |                              |                      |                                                    |
|  | Rita Coram, MD            | Anne Marie Webb, BSN         | Louisville, KY       | University of Louisville (3)                       |
|  |                           | Ellie Fridell, BS            |                      |                                                    |
|  |                           | Heidi Wilson, BS             |                      |                                                    |
|  | Sabu Thomas, MD, MSc      | Angela Kim, BS               | Rochester, NY        | University of Rochester (3)                        |
|  | Ronald G Schwartz, MD, MS | Patrick Wilmot, BS           |                      |                                                    |
|  | Wei Chen, MD, MS          |                              |                      |                                                    |
|  | Mahfouz El Shahawy, MD    | Ramona Stevens               | Sarasota, FL         | Cardiovascular Center of Sarasota (3)              |
|  | James Stafford, MD        | Loriane Black                | Baltimore, MD        | University of Maryland Medical Center (3)          |

|  |                              |                           |                  |                                                       |
|--|------------------------------|---------------------------|------------------|-------------------------------------------------------|
|  | William B. Abernethy, MD     | Amber B. Hull, RN         | Asheville, NC    | Asheville Cardiology Associates (3)                   |
|  |                              | Olivia J. Lim, RN         |                  |                                                       |
|  |                              | Helen C. Tucker           |                  |                                                       |
|  |                              | Natasha C. Putnam, RN     |                  |                                                       |
|  |                              | Linda L. Hall             |                  |                                                       |
|  |                              | Tia Cauthren              |                  |                                                       |
|  |                              | Trish Tucker              |                  |                                                       |
|  | Andrew Zurick, MD            | Hollie Horton             | Nashville, TN    | Saint Thomas Hospital (3)                             |
|  |                              | Jan Orga                  |                  |                                                       |
|  | Thomas M. Meyer, MD          | Joyce R. White, MSN NP-C  | Lynchburg, VA    | Stroobants Cardiovascular Center (3)                  |
|  | Ronald G. Morford, MD        | Cynthia Baumann, RN       |                  |                                                       |
|  | Bruce Rutkin, MD             | Vidya Seeratan            | Manhasset, NY    | Northwell Health - Manhasset (3)                      |
|  | Sabahat Bokhari, MD          | Magnolia Jimenez          | New York, NY     | Columbia University Medical Center (3)                |
|  | Seth I. Sokol, MD            | Cidney Schultz, RN        | Bronx, NY        | Jacobi Medical Center (3)                             |
|  | Jay Meisner, MD              | Jeanne Russo, RN          |                  |                                                       |
|  | Ihab Hamzeh, MD              |                           |                  |                                                       |
|  | Arunima Misra, MD            | Zohra Huda, RN, BSN, CCRP | Houston, TX      | Baylor College of Medicine (3)                        |
|  | Matthew Wall Jr., MD         | Araceli Boan              |                  |                                                       |
|  | Veronica Lenges De Rosen, MD |                           |                  |                                                       |
|  | Mahboob Alam, MD             |                           |                  |                                                       |
|  | Michael C. Turner, MD        | Christine R Hinton        | Lake Charles, LA | Cardiovascular Specialists of Southwest Louisiana (3) |
|  | Thomas J. Mulhearn, MD       |                           |                  |                                                       |
|  | Arnold P. Good, MD           | Beth A. Archer, BSN, RN   | Columbus, OH     | Ohio Health Grant Medical Center (3)                  |
|  |                              | Julia S. Dionne, BA       |                  |                                                       |

|  |                               |                                 |                 |                                                        |
|--|-------------------------------|---------------------------------|-----------------|--------------------------------------------------------|
|  |                               | Cheryl A. Allardyce,<br>BSN, RN |                 |                                                        |
|  |                               | Lindsey N. Sikora,<br>BSN, RN   |                 |                                                        |
|  |                               | Jennifer H. Czerniak,<br>RN     |                 |                                                        |
|  |                               | Jennifer A. Mull, MSN,<br>RN    |                 |                                                        |
|  |                               | Elizabeth Ferguson              |                 |                                                        |
|  |                               | Frances Laube                   |                 |                                                        |
|  | Nicolas W.<br>Shammas, MD, MS | Gail A Shammas,<br>BSN, RN      | Davenport, IA   | Midwest Cardiovascular<br>Research Foundation<br>(3)   |
|  |                               | Lori Christensen                |                 |                                                        |
|  |                               | Holly Park                      |                 |                                                        |
|  | Robert Chilton, MD            | Joan Hecht                      | San Antonio, TX | Audie Murphy V.A. (2)                                  |
|  | Patricia K. Nguyen,<br>MD     | Davis Vo, BS                    | Palo Alto, CA   | VA Palo Alto<br>Healthcare System (2)                  |
|  |                               | James Hirsch                    |                 |                                                        |
|  | Matthew Jezior,<br>MD         | Jody Bindeman                   | Bethesda, MD    | Walter Reed National<br>Military Medical Center<br>(2) |
|  |                               | Sara Salkind                    |                 |                                                        |
|  |                               | Dalisa Espinosa, MBS            | Providence, RI  | Miriam Hospital (2)                                    |
|  |                               | Lori-Ann Desimone,<br>BSN       |                 |                                                        |
|  | Paul C. Gordon,<br>MD         | Lina Felix-Stern                |                 |                                                        |
|  | Thomas Crain, MD              | Jassira Gomes                   |                 |                                                        |
|  |                               | Catherine Gordon,<br>BSN        |                 |                                                        |
|  | Robert Stenberg,<br>MD        | Aimee Mann                      | Johnstown, PA   | Conemaugh Valley<br>Memorial Hospital (2)              |
|  |                               | Theresa McCreary                |                 |                                                        |
|  | Ronald P.<br>Pedalino, MD     | Stanley E. Cobos, BA            | Brooklyn, NY    | NYU-HHC Kings<br>County Hospital Center<br>(2)         |
|  |                               | Raven R. Dwyer, MPH             |                 |                                                        |
|  |                               | Dalisa Espinosa, MBS            |                 |                                                        |
|  |                               | Kirsten J. Quiles, MS           |                 |                                                        |
|  | Joseph Wiesel, MD             | Stanley E. Cobos, BA            | Flushing, NY    | New York University -<br>Langone                       |
|  |                               | Raven R. Dwyer, MPH             |                 |                                                        |

|  |                                       |                              |                  |                                                      |
|--|---------------------------------------|------------------------------|------------------|------------------------------------------------------|
|  |                                       | Dalisa Espinosa, MBS         |                  | Cardiovascular Associates (2)                        |
|  |                                       | Kirsten J. Quiles, MS        |                  |                                                      |
|  | George J. Juang, MD                   | Candace Gopaul, BS           | Brooklyn, NY     | Coney Island Hospital (2)                            |
|  |                                       | Karen Hultberg               |                  |                                                      |
|  |                                       | Tauqir Huk                   |                  |                                                      |
|  |                                       | Afshan Hussain               |                  |                                                      |
|  | Mohammed Al-Amoodi, MD                | Yesenia Zambrano, BS         | Yuma, AZ         | Yuma Regional Medical Center (2)                     |
|  |                                       | Sarah Medina Rodriguez       |                  |                                                      |
|  |                                       | Trudie Milner                |                  |                                                      |
|  | David Wohns, MD                       | Abbey Mulder, RN             | Grand Rapids, MI | Spectrum Health (2)                                  |
|  |                                       | Stacie Van Oosterhout, MEd   |                  |                                                      |
|  | Ellis W. Lader, MD                    | Martha Meyer, RN, MSN        | Kingston, NY     | Mid Valley Cardiology (1)                            |
|  | Michael Mumma, MD                     | Nancy L. Clapp, RN, BA, CCRC | Sarasota, FL     | Sarasota Memorial Hospital (1)                       |
|  |                                       | Heather Barrentine           |                  |                                                      |
|  | Lekshmi Dharmarajan, MD               | Jenne M. Jose, PA            | Bronx, NY        | NYU-HHC Lincoln Medical and Mental Health Center (1) |
|  |                                       | Stanley E. Cobos, BA         |                  |                                                      |
|  |                                       | Raven R. Dwyer, MPH          |                  |                                                      |
|  |                                       | Dalisa Espinosa, MBS         |                  |                                                      |
|  |                                       | Kirsten J. Quiles, MS        |                  |                                                      |
|  |                                       | Jenne Manchery               |                  |                                                      |
|  | Joseph F.X. McGarvey Jr, MD           | Vera McKinney, RN            | Doylestown, PA   | Doylestown Health Cardiology (1)                     |
|  |                                       | Linda Schwarz, RN            |                  |                                                      |
|  | Thomas R. Downes, MD (till Dec. 2016) | Scott M. Kaczowski           | Loveland, CO     | Medical Center of the Rockies (1)                    |
|  | Gary J. Luckasen, MD (from Dec. 2016) | Adam J. Jaskowiak            |                  |                                                      |
|  |                                       | Joel Klitch                  |                  |                                                      |
|  | Benjamin Cheong, MD                   | Debra Dees                   | Houston, TX      | Baylor St. Luke's Medical Center (1)                 |

|                     |                                              |                             |                   |                                                         |
|---------------------|----------------------------------------------|-----------------------------|-------------------|---------------------------------------------------------|
|                     | Srinivasa Potluri, MD                        | Precilia Vasquez            | Plano, TX         | Baylor Research Institute at Legacy Heart Center (1) ** |
|                     | Ronald A. Mastouri, MD                       |                             | Indianapolis, IN  | Indiana University/Krannert Institute of Cardiology (1) |
|                     | Jeffery A. Breall, MD, PhD                   | Elise L. Hannemann, RN,CCRC |                   |                                                         |
|                     | George E. Revtyak, MD                        | Judy Mae Foltz, RN,CCRC     |                   |                                                         |
|                     | Jonathan W. Bazeley, MD                      |                             |                   |                                                         |
|                     | Dayuan Li, MD                                | Emily DeRosa                | St. Paul, MN      | HealthEast Saint Joseph's Hospital (1)                  |
|                     |                                              | Beth Jorgenson              |                   |                                                         |
|                     |                                              | Joyce Riestenberg-Smith     |                   |                                                         |
|                     | Kenneth Giedd, MD                            |                             | New York, NY      | Beth Israel Medical Center (1)                          |
|                     | Wayne Old, MD                                | Rebecca Bariciano           | Chesapeake, VA    | Cardiovascular Associates, Ltd. (1)                     |
|                     | Francis Burt, MD                             |                             | Bethlehem, PA     | Saint Luke's Hospital and Health Network (1)            |
|                     | Kozhaya Sokhon, MD                           | Jessica Waldron             | Sugar land, TX    | Medicus Alliance Clinical Research Org., Inc. (1)       |
|                     |                                              | Michelle Mayon              |                   |                                                         |
|                     | Deepika Gopal, MD                            |                             | Plano, TX         | The Heart Hospital Baylor (1)                           |
|                     | Uma S. Valeti, MD                            | Gretchen Ann Peichel, RN    | Minneapolis, MN   | University of Minnesota (1)                             |
|                     | Jon Kobashigawa, MD                          | Brandy Starks               | Beverly Hills, CA | Cedars Sinai Medical Center (1)                         |
|                     |                                              | Lucilla Garcia              |                   |                                                         |
|                     |                                              | Maria Thottam               |                   |                                                         |
| India (941)         |                                              |                             |                   |                                                         |
| Country Leader      |                                              |                             |                   |                                                         |
| Balram Bhargava, DM |                                              |                             |                   |                                                         |
|                     |                                              | Anjali Anand, MSc           | Calicut           | Government Medical College (208)                        |
|                     | Sajeev Chakanalil Govindan, MD, DNB, DM, PhD | Janitha Raj, B.Tech         |                   |                                                         |

|  |                                                  |                                                  |           |                                                                               |
|--|--------------------------------------------------|--------------------------------------------------|-----------|-------------------------------------------------------------------------------|
|  | Rajesh Gopalan<br>Nair, MD, DNB, DM              | Reshma Ravindran,<br>MSc                         |           |                                                                               |
|  |                                                  | Rajalekshmi VS, MSc,<br>MScCRRA                  |           |                                                                               |
|  | Cholenahally<br>Nanjappa<br>Manjunath, MD,<br>DM | Nandita Nataraj,<br>BE(Biotech)<br>PGDICRCMD     | Bengaluru | Sri Jayadeva Institute of<br>Cardiovascular<br>Sciences and Research<br>(149) |
|  | Nagaraja Moorthy,<br>MD, DM                      | Soundarya Nayak,<br>BE(Biotech)<br>PGDICRCMD     |           |                                                                               |
|  | Satvic<br>Cholenahally<br>Manjunath, MD,DM       | Mahevamma<br>Mylarappa, GNM<br>(General Nursing) |           |                                                                               |
|  | Suryaprakash<br>Narayanappa,<br>MBBS             |                                                  |           |                                                                               |
|  | Neeraj Pandit, MD,<br>DM                         | Sheromani Bajaj                                  | New Delhi | Dr Ram Manohar Lohia<br>Hospital (101)                                        |
|  | Ranjit Kumar Nath,<br>MD, DM                     | Vandana Yadav,<br>Msc,PGDACR                     |           |                                                                               |
|  |                                                  | Girish Mishra, Msc,<br>PGDACR                    |           |                                                                               |
|  | S.K. Dwivedi, DM                                 | Roma Tewari, PG                                  | Lucknow   | King George's Medical<br>University, Department<br>of Cardiology (100)        |
|  | V.S. Narain, DM                                  | Meenakshi Mishra,<br>PG                          |           |                                                                               |
|  | Sharad Chandra,<br>DM                            | Shivali Patel                                    |           |                                                                               |
|  |                                                  | Suman Singh, PG                                  |           |                                                                               |
|  | Gurpreet S.<br>Wander, DM                        |                                                  | Ludhiana  | Hero DMC Heart<br>Institute, Dayanand<br>Medical College and<br>Hospital (83) |
|  | Rohit Tandon, MD                                 |                                                  |           |                                                                               |
|  | Sarju Ralhan, M.Ch<br>(CTVS)                     | Baljeet Kaur, MSc<br>(Biotechnology)             |           |                                                                               |
|  | Naved Aslam, DM                                  | Sonika Gupta , MBA,<br>B. Pharmacy               |           |                                                                               |
|  | Abhishek Goyal,<br>DM                            |                                                  |           |                                                                               |
|  | Balram Bhargava,<br>DM                           | Chandini Suvarna,<br>BDS                         | New Delhi | All India Institute Of<br>Medical Sciences (67)                               |

|  |                                 |                                                             |             |                                              |
|--|---------------------------------|-------------------------------------------------------------|-------------|----------------------------------------------|
|  | G.Karthikeyan, DM               |                                                             |             |                                              |
|  | S.Ramakrishnan, DM              |                                                             |             |                                              |
|  | Sandeep Seth, DM                |                                                             |             |                                              |
|  | Rakesh Yadav, DM                |                                                             |             |                                              |
|  | Sandeep Singh, DM               |                                                             |             |                                              |
|  | Ambuj Roy, DM                   |                                                             |             |                                              |
|  | Neeraj Parakh, DM               |                                                             |             |                                              |
|  | Sunil Kumar Verma, DM           |                                                             |             |                                              |
|  | Rajiv Narang, DM                |                                                             |             |                                              |
|  | Sundeep Mishra, DM              |                                                             |             |                                              |
|  | Nitish Naik, DM                 |                                                             |             |                                              |
|  | Gautam Sharma, DM               |                                                             |             |                                              |
|  | Shiv Kumar Choudhary, M.Ch      |                                                             |             |                                              |
|  | Chetan Patel, DNB               |                                                             |             |                                              |
|  | Gurpreet Gulati, MD             |                                                             |             |                                              |
|  | Sanjeev Sharma, MD              |                                                             |             |                                              |
|  | V K Bahl, DM                    |                                                             |             |                                              |
|  | Anoop Mathew, MD                | Binoy Mannekkattukudy Kurian                                | Kolenchery  | MOSC Medical College Hospital (39)           |
|  | Eapen Punnoose, MD              |                                                             |             |                                              |
|  | Milind Avdhoot Gadkari, MD      | Sheetal Rupesh Karwa, BHMS                                  | Pune        | KEM Hospital Pune (35)                       |
|  | Siddharth Gadage, MD DNB        | Suvarna Kolhe, MSc                                          |             |                                              |
|  | Tapan Umesh Pillay, BHMS MSc    |                                                             |             |                                              |
|  | Santhosh Satheesh, MBBS, MD, DM | R. J. Vindhya, B.Sc. (Bio-Technology), MSc(Bio-Informatics) | Pondicherry | Jawaharlal Institute of Postgraduate Medical |

|  |                                        |                                         |           |                                     |
|--|----------------------------------------|-----------------------------------------|-----------|-------------------------------------|
|  |                                        |                                         |           | Education & Research (JIPMER) (31)  |
|  |                                        | Peeyush Jain, MD                        | New Delhi | Fortis Escort Heart Institute (31)  |
|  |                                        | Ashok Seth, MD                          |           |                                     |
|  |                                        | Zile Singh Meharwal, MD                 |           |                                     |
|  | Atul Mathur, MD                        | Atul Verma, MD                          |           |                                     |
|  | Upendra Kaul, MD                       | Mona Bhatia, MD                         |           |                                     |
|  |                                        | Ankush Sachdeva, MD                     |           |                                     |
|  |                                        | Thounaojam Indira Devi, RN              |           |                                     |
|  |                                        | Nungshi Jungla, RN                      |           |                                     |
|  | Johann Christopher, MD, DNB            | K. Manjula Rani, MSc.                   | Hyderabad | Gurunanak CARE Hospital (27)        |
|  | Rajeev Menon, MD, DNB                  | M. Sowjanya Reddy, BSc                  |           |                                     |
|  | Nirmal Kumar, MD, DNB                  | K. Preethi, BSc                         |           |                                     |
|  | Abraham Oomman, MD,DM,DNB              | Rinu R sidh, MSc(Clinical Research)     | Chennai   | Apollo Research and Innovation (23) |
|  | Robert Mao, MD, DM                     | Ramakrishnan T., B.Tech(Biotechnology ) |           |                                     |
|  | Hilda Solomon, PhD                     | Rajesh Francis, MSc(Clinical Research)  |           |                                     |
|  | Sudhir Naik, MD, DM                    | Vamshi Priya P., MSc                    | Hyderabad | Apollo Research & Innovations (13)  |
|  | Sajeeda Parveen Khan, MBBS, (Dip.Card) |                                         |           |                                     |
|  | Johann Christopher, MD                 | Kotiboinna Preethi                      | Hyderabad | CARE Nampally (11)                  |
|  | Nirmal Kumar, MD                       |                                         |           |                                     |
|  | Purvez Grant, MD                       | Shweta Hande, BHMS, PGDCR               | Pune      |                                     |

|                                        |                                            |                                               |            |                                                                                |
|----------------------------------------|--------------------------------------------|-----------------------------------------------|------------|--------------------------------------------------------------------------------|
|                                        |                                            | Poonam Sonawane,<br>B.ScMicrobiology,<br>ACCR |            | Ruby Hall Clinic, Grant<br>Medical Foundation<br>(10)                          |
|                                        | Ranjan Kachru, MD                          | Abhishek Dubey                                | New Delhi  | Fortis Healthcare Fl.t Lt.<br>Rajan Dhall Hospital (4)                         |
|                                        |                                            | Kavita Rawat                                  |            |                                                                                |
|                                        | Ajit Kumar VK, MD,<br>DM                   |                                               | Trivandrum | Sree Chitra Tirunal<br>Institute for Medical<br>Sciences and<br>Technology (3) |
|                                        | Sanjay Ganapathi,<br>MD, DM                |                                               |            |                                                                                |
|                                        | Jayakumar K, MS,<br>M.Ch                   | Vineeth CP                                    |            |                                                                                |
|                                        | Harikrishnan<br>Sivadasanpillai,<br>MD, DM | Manas Chacko, RN                              |            |                                                                                |
|                                        | Bijulal Sasidharan,<br>MD, DM              | Suresh Babu                                   |            |                                                                                |
|                                        | Kapilamoorthy TR,<br>MD                    |                                               |            |                                                                                |
|                                        | Johann<br>Christopher, MD                  | Sowjanya Reddy                                | Hyderabad  | CARE Hospital (3)                                                              |
|                                        | Praneeth Polamuri,<br>MD                   | Manjula Rani                                  |            |                                                                                |
|                                        | Upendra Kaul, MD                           | Priyadarshani<br>Arambam                      | New Delhi  | Batra Hospital and<br>Medical Research<br>Centre (BHMRC) (3)                   |
|                                        |                                            | Bebek Singh                                   |            |                                                                                |
| United Kingdom<br>(539)                |                                            |                                               |            |                                                                                |
| Country Leaders                        |                                            |                                               |            |                                                                                |
| Roxy Senior,<br>MBBS, MD, DM           |                                            |                                               |            |                                                                                |
| Keith AA Fox,<br>MBChB ( <i>past</i> ) |                                            |                                               |            |                                                                                |
| Country<br>Coordinators                |                                            |                                               |            |                                                                                |
| Grace M. Young , MSc, BSc (Hons)       |                                            |                                               |            |                                                                                |
| Kathryn<br>Carruthers ( <i>past</i> )  |                                            |                                               |            |                                                                                |
|                                        | Roxy Senior,<br>MBBS, MD, DM               |                                               | Harrow     | Northwick Park Hospital<br>Harrow/ Royal                                       |

|  |                                                |                                                   |                   |                                                              |
|--|------------------------------------------------|---------------------------------------------------|-------------------|--------------------------------------------------------------|
|  | Ahmed Elghamaz,<br>MB BCh                      |                                                   |                   | Brompton Hospital<br>London (202)                            |
|  | Sothinathan<br>Gurunathan,<br>MBChB            |                                                   |                   |                                                              |
|  | Nikolaos<br>Karogiannis, MBBS                  | Grace M. Young ,<br>MSc, BSc (Hons)               |                   |                                                              |
|  | Benoy N Shah,<br>MD, MBBS, BSc<br>(Hons)       | Christopher Kinsey                                |                   |                                                              |
|  | Richard HJ<br>Trimlett, MBBS,<br>CCST          | Raisa Kavalakkat,<br>MSc, BSc, RN                 |                   |                                                              |
|  | Michael B Rubens,<br>LRCP, MRCS,<br>MBBS, DMRD | Jo Evans, RN                                      |                   |                                                              |
|  | Edward D Nicol,<br>MD, BMedSci,<br>MBBS, DTM&H | Ikraam Hassan, RN                                 |                   |                                                              |
|  | Tarun K Mittal, MD                             |                                                   |                   |                                                              |
|  | Reinette Hampson,<br>BSc (Hons), BA<br>(Hons)  |                                                   |                   |                                                              |
|  | Reto Andreas<br>Gamma, MBBS                    | Sarah Williams, RN                                | Chelmsford        | Broomfield Hospital<br>(39)                                  |
|  |                                                | Kim Holland, RN                                   |                   |                                                              |
|  |                                                | Karen Swan, RN                                    |                   |                                                              |
|  | Mark A de Belder,<br>MD                        | Bev Atkinson, RN                                  | Middlesbrough     | The James Cook<br>University Hospital,<br>Middlesbrough (37) |
|  | Jeet Thambyrajah,<br>MD                        |                                                   |                   |                                                              |
|  | Thuraia Nageh,<br>BSc(Hons) MBBS<br>MD MRCP    | Swapna Kunhunny,<br>MRes Clin Res, BSc<br>(N), RN | Westcliffe on Sea | Southend University<br>Hospital (34)                         |
|  | John R Davies,<br>MBBS, PhD                    |                                                   |                   |                                                              |
|  | Steven J. Lindsay,<br>MD                       | Craig Atkinson, RN                                | Bradford          | Bradford Royal<br>Infirmary (20)                             |
|  | John Kurian, MD                                | Carita Krannila, RN                               |                   |                                                              |
|  | Hageel Jamil, MD                               | Manitha Vinod, RN                                 |                   |                                                              |

|  |                                         |                                    |             |                                                          |
|--|-----------------------------------------|------------------------------------|-------------|----------------------------------------------------------|
|  | Osama Raheem, MD                        |                                    |             |                                                          |
|  | Angela Hoye, MD                         | Lisa Chaytor                       | Cottingham  | The University of Hull/Castle Hill Hospital (19)         |
|  |                                         | Leanne Cox                         |             |                                                          |
|  |                                         | Julie Morrow                       |             |                                                          |
|  |                                         | Kay Rowe                           |             |                                                          |
|  | Patrick Donnelly, MD                    | Stephanie Kelly, RN                | Belfast     | South Eastern Health and Social Care (17)                |
|  | Bernardas Valecka, MD                   | Susan Regan, RN                    |             |                                                          |
|  |                                         | Dawn Turnbull                      |             |                                                          |
|  | Anoop Chauhan, MD                       | Catherine Fleming                  | Blackpool   | Blackpool Teaching Hospitals (16)                        |
|  |                                         | Arijit Ghosh                       |             |                                                          |
|  |                                         | Karen Gratrix                      |             |                                                          |
|  |                                         | Stephen Preston                    |             |                                                          |
|  | Craig Barr, MD                          | Anne Cartwright                    | Dudley      | Russells Hall Hospital (15)                              |
|  | Khaled Alfakih, MBBS, MD                | Abigail Knighton, BSc., PG Dip.    | London      | King's College NHS Foundation Hospital (14)              |
|  | Jonathan Byrne, PhD                     | Katherine Martin, RGN, Dip. N, MSc |             |                                                          |
|  | Ian Webb, PhD, MA                       |                                    |             |                                                          |
|  | Peter Henriksen, PhD, MB ChB, BSc(Hons) | Laura Flint, RGN                   | Edinburgh   | Royal Infirmary of Edinburgh (13)                        |
|  |                                         | James Harrison, BSc(Hons), PG dip  |             |                                                          |
|  | Peter OKane, MD                         | Nicki Lakeman                      | Bournemouth | Royal Bournemouth Hospital (13)                          |
|  |                                         | Anja Ljubez                        |             |                                                          |
|  | Ramesh de Silva, MB ChB, MD             |                                    | Bedford     | Bedford Hospital NHS Trust (11)                          |
|  | Dwayne S. G. Conway, MD                 | Judith Wright                      | Wakefield   | Pinderfields Hospital (11)                               |
|  |                                         | Donna Exley                        |             |                                                          |
|  | Alexander A Sirker, MB BChir, PhD       |                                    | London      | University College London Hospitals NHS Foundation Trust |
|  |                                         | Mervyn Andiapen, RN                |             |                                                          |

|  |                                        |                       |              |                                                    |
|--|----------------------------------------|-----------------------|--------------|----------------------------------------------------|
|  |                                        | Amy J. Richards, BSc  |              | BartsHealth NHS Trust                              |
|  |                                        |                       |              | (11)                                               |
|  | Stephen P Hoole, MD                    | Lisa Wong, MSc        | Cambridge    | Papworth Hospital (10)                             |
|  | Fraser N. Witherow, MD                 | Melanie J. Munro, RGN | Dorchester   | Dorset County Hospital (8)                         |
|  | Nicola Johnston, MB, Bch BAO, MRCP, MD |                       | Belfast      | Belfast Trust (7)                                  |
|  | Mark Harbinson, MB, Bch BAO, MRCP, MD  | Michelle McEvoy, RN   |              |                                                    |
|  | Simon Walsh, MB, Bch BAO, MD           | Caroline Brown, RN    |              |                                                    |
|  | Hanna Douglas, MB, Bch BAO, MRCP, MD   |                       |              |                                                    |
|  | Matthew Luckie, MD                     | Thabitha Charles      | Manchester   | Central Manchester University Hospital (7)         |
|  |                                        | Laurel Kolakaluri     |              |                                                    |
|  |                                        | Hannah Phillips       |              |                                                    |
|  | Jolanta Sobolewska, MD                 | Louise Morby, RN      | Oldham       | The Pennine Acute Hospitals NHS Trust (6)          |
|  |                                        | Karen Hallett, RN     |              |                                                    |
|  |                                        | Carolyn Corbett, RN   |              |                                                    |
|  |                                        | Lynne Winstanley      |              |                                                    |
|  | Paramjit Jeetley, MD                   | Angelique Smit, RN    | London       | Royal Free London NHS Foundation Trust (6)         |
|  | Niket Patel, MD                        |                       |              |                                                    |
|  | Tushar Kotecha, MBChB, Mpharm          |                       |              |                                                    |
|  | Christopher Travill, MBBS, MD          | Susan Gent, SRN RGN   | Luton        | Luton and Dunstable University Hospital NHS FT (5) |
|  | Iqbal Karimullah, MBBS                 | Nafisa Hussain, BSc   |              |                                                    |
|  | Mahmud Al-Bustami, MBBS                |                       |              |                                                    |
|  | Denise Braganza, MD                    | Fiona Haines          | Peterborough | Peterborough City Hospital (5)                     |
|  |                                        | Joanne Taaffe         |              |                                                    |

|                           |                                  |                            |             |                                                                    |
|---------------------------|----------------------------------|----------------------------|-------------|--------------------------------------------------------------------|
|                           | Robert Henderson,<br>MD          | Jane Burton                | Nottingham  | Nottingham University<br>Hospitals (4)                             |
|                           | Kate Pointon,<br>MBBS            | Maria Colton               |             |                                                                    |
|                           | Surendra Naik,<br>PhD            | Rachel King                |             |                                                                    |
|                           | Thomas Mathew,<br>MBBS, MD, DM   |                            |             |                                                                    |
|                           |                                  | Ammani Brown, MSc<br>BA RN | Clydebank   | University of Glasgow<br>(4)                                       |
|                           |                                  | Andrew Docherty, RN        |             |                                                                    |
|                           | Colin Berry, BSc<br>MB ChB, PhD  | Lisa McCloy, RN            |             |                                                                    |
|                           | Damien Collison,<br>MB ChB       | Kate Robb, RN              |             |                                                                    |
|                           | Giles Roditi, MB<br>ChB          | Craig Paterson, PhD        |             |                                                                    |
|                           |                                  | Wenda Crawford, RN         |             |                                                                    |
|                           |                                  | Joanne Kelly, RN           |             |                                                                    |
|                           |                                  | Lorraine McGregor,<br>RN   |             |                                                                    |
|                           | Andrew J Moriarty,<br>BSc MB PhD | Anne Mackin, RN,<br>BSc    | Craigavon   | Cardiovascular<br>Research Unit,<br>Craigavon Area<br>Hospital (2) |
|                           | Jason D. Glover,<br>MBBS         | Janet P Knight, RN         | Basingstoke | Hampshire Hospitals<br>NHS Foundation Trust<br>(2)                 |
|                           | Jiwan Pradhan,<br>MBBS           |                            |             |                                                                    |
|                           | Ghada Mikhail, MD                | Tuhina Bose                | London      | Imperial College<br>Healthcare NHS Trust<br>(1)                    |
|                           | Darrel P. Francis,<br>MD, MA     |                            |             |                                                                    |
| *Canada (447)             |                                  |                            |             |                                                                    |
| Country Leaders           |                                  |                            |             |                                                                    |
| Vladimir Dzavik,<br>MD    |                                  |                            |             |                                                                    |
| Shaun Goodman,<br>MD, MSc |                                  |                            |             |                                                                    |

|                      |                        |                        |                    |                                                    |
|----------------------|------------------------|------------------------|--------------------|----------------------------------------------------|
| Gilbert Gosselin, MD |                        |                        |                    |                                                    |
|                      | Gilbert Gosselin, MD   | Anna Proietti, RN      | Montreal, QC       | Montreal Heart Institute (90)                      |
|                      |                        | Myriam Brousseau, RN   |                    |                                                    |
|                      |                        | Magalie Corfias, RN    |                    |                                                    |
|                      |                        | Patricia Blaise        |                    |                                                    |
|                      |                        | Luc Harvey             |                    |                                                    |
|                      | Ariel Diaz, MD         |                        | Trois-Rivieres, QC | Centre Hospitalier de Regional Trois-Rivieres (71) |
|                      | Philippe Rheault, MD   |                        |                    |                                                    |
|                      | Miguel Barrero, MD     |                        |                    |                                                    |
|                      | Carl-Éric Gagné, MD    | Patricia Alarie        |                    |                                                    |
|                      | Yanek Pépin-Dubois, MD | Linda Arcand           |                    |                                                    |
|                      | Ricardo Costa, MD      | Isabelle Roy           |                    |                                                    |
|                      | Ying Tung Sia, MD      | Estelle Montpetit      |                    |                                                    |
|                      | Catherine Lemay, MD    |                        |                    |                                                    |
|                      | Alejandro Gisbert, MD  |                        |                    |                                                    |
|                      | Pierre Gervais, MD     |                        |                    |                                                    |
|                      | Alain Rheault, MD      |                        |                    |                                                    |
|                      |                        | Katia Drouin, RN       | Terrebonne, QC     | CISSSL - Hopital Pierre-Le Gardeur (42)            |
|                      | Denis Carl Phaneuf, MD | Christine Bergeron, RN |                    |                                                    |
|                      | Gilbert Gosselin, MD   | Christine Shelley      |                    |                                                    |
|                      |                        | Christine Masson       |                    |                                                    |
|                      | Pallav Garg, MBBS, MSc | Sandy Carr, RN         | London, ON         | London Health Sciences Centre (35)                 |
|                      |                        | Catherine Bone, RN     |                    |                                                    |
|                      | Benjamin J.W. Chow, MD | Ermina Moga            | Ottawa, ON         | University of Ottawa Heart Institute (29)          |
|                      | Renee C. Hessian, MD   | Janetta Kourzenkova    |                    |                                                    |

|  |                                       |                                |                 |                                 |
|--|---------------------------------------|--------------------------------|-----------------|---------------------------------|
|  | Rob S. Beanlands, MD                  | Olga Walter                    |                 |                                 |
|  | Richard F. Davies, MD                 |                                |                 |                                 |
|  | Kevin R. Bainey, MD, MSc              | Norma Hogg, RN                 | Edmonton, AB    | University of Alberta (28)      |
|  |                                       | Suzanne Welsh, RN              |                 |                                 |
|  | Asim N. Cheema, MD, PhD               |                                | Toronto, ON     | St. Michael's Hospital (27)     |
|  | Akshay Bagai, MD, MHS                 |                                |                 |                                 |
|  | Ron Wald, MDCM, MPH                   |                                |                 |                                 |
|  | Shaun Goodman, MD, MSc                | Khrystyna Kushniriuk, HBSc, MD |                 |                                 |
|  | John Joseph Graham, MRCP, MB ChB, BSc | Mohammed Hussain               |                 |                                 |
|  | Mark Peterson, MD, FRCSC, PhD         | Olugbenga Bello                |                 |                                 |
|  | Chi-Ming Chow, MD, CM, MSc            |                                |                 |                                 |
|  | Beth Abramson, MD, MSc                |                                |                 |                                 |
|  | Asim Nazir Cheema, MD                 | Ishba Syed, MBBS               | Mississauga, ON | Dixie Medical Group (24)        |
|  | Mohammad Tariq Vakani, MD             | Mohammed Hussain, BSc(H)       |                 |                                 |
|  |                                       | Khrystyna Kushniriuk, MBBS     |                 |                                 |
|  | James Cha, MD                         | Judy Otis, CRC                 | Oshawa, ON      | Dr. James Cha (21)              |
|  |                                       | Rebecca Otis, CRC              |                 |                                 |
|  | Andrew G Howarth, MD, PhD             | Michelle M Seib, RN            | Calgary, AB     | University of Calgary (15)      |
|  |                                       | Sandra M Rivest, RN            |                 |                                 |
|  |                                       | Rosa Sandonato, BSCN           |                 |                                 |
|  | Graham Wong, MD                       | Jackie Chow                    | Vancouver, BC   | Vancouver General Hospital (15) |
|  |                                       | Andrew Starovoytov             |                 |                                 |
|  |                                       | Naomi Uchida                   |                 |                                 |

|                                  |                       |                        |                    |                                                                              |
|----------------------------------|-----------------------|------------------------|--------------------|------------------------------------------------------------------------------|
|                                  |                       | Ngairé Meadows         |                    |                                                                              |
|                                  | Amar Uxa, MD          | Nadia Asif             | Toronto, ON        | University Health Network (14)                                               |
|                                  |                       | Suzana Tavares         |                    |                                                                              |
|                                  | Paul Galiwango, MD    | Bev Bozek, RN, CCRC    | Scarborough, ON    | Scarborough Cardiology Research (9)                                          |
|                                  | Saleem Kassam, MD     | Maria Shier            |                    |                                                                              |
|                                  | Ashok Mukherjee, MD   | Lori-Ann Larmand       |                    |                                                                              |
|                                  | A. Joseph Ricci, MD   | Amir Janmohamed        |                    |                                                                              |
|                                  |                       | Brenda Hart            |                    |                                                                              |
|                                  | Andy Lam, MD          | Jane Marucci           | East Grimsby, ON   | West Lincoln Memorial Hospital (8)                                           |
|                                  |                       | Sharon Tai             |                    |                                                                              |
|                                  | Shamir Mehta, MD      | Sonya Brons, RN        | Hamilton, ON       | Hamilton General Hospital (7)                                                |
|                                  |                       | Chris Beck, RN         |                    |                                                                              |
|                                  |                       | Glenda Wong, RN        |                    |                                                                              |
|                                  |                       | Krystal Etherington    |                    |                                                                              |
|                                  |                       | Thippeekaa Arumairajah |                    |                                                                              |
|                                  | Jacob Udell, MD       | Maria Aprile           | Toronto, ON        | Women's College Hospital (7)                                                 |
|                                  |                       | Sara Karlsson          |                    |                                                                              |
|                                  |                       | Susan Webber           |                    |                                                                              |
|                                  | Philippe Généreux, MD | Chantale Mercure       | Montréal, QC       | Centre Intégré Universitaire de Santé et de Services Sociaux du Montréal (2) |
|                                  | Adnan Hameed, MD      | Nancy Aedy             | St. Catharines, ON | Saint Catharines General Hospital (2)                                        |
|                                  | Ledjalem Daba, MD     | Fran Farquharson       | Vaughan, ON        | Northwest GTA Cardiovascular and Heart Rhythm Program (1)                    |
|                                  |                       | Anam Siddiqui          |                    |                                                                              |
| Brazil (399)                     |                       |                        |                    |                                                                              |
| Country Leaders                  |                       |                        |                    |                                                                              |
| Antonio Carlos Carvalho, MD, PhD |                       |                        |                    |                                                                              |
| Renato D. Lopes, MD, PhD         |                       |                        |                    |                                                                              |

|  |                                              |                                      |                |                                                                                                                |
|--|----------------------------------------------|--------------------------------------|----------------|----------------------------------------------------------------------------------------------------------------|
|  | Whady Hueb, MD                               | Myrthes Emy Takiuti,<br>RN           | Sao Paulo      | Heart Institute (InCor)<br>University of São Paulo<br>(127)                                                    |
|  | Paulo Cury<br>Rezende, MD                    |                                      |                |                                                                                                                |
|  | Expedito Eustáquio<br>Ribeiro Silva, MD      |                                      |                |                                                                                                                |
|  | Alexandre Ciappina<br>Hueb, MD               |                                      |                |                                                                                                                |
|  | Paola Emanuela<br>Poggio Smanio,<br>MD, PhD  | Leonardo Pizzol<br>Caetano, PhD      | São Paulo      | Instituto Dante<br>Pazzanese de<br>Cardiologia (98)                                                            |
|  | Alexandre Schaan<br>de Quadros, MD           |                                      | Porto Alegre   | Instituto de Cardiologia<br>de Porto Alegre (41)                                                               |
|  | Renato Abdala<br>Karam Kalil, MD             | Aline Peixoto Deiro                  |                |                                                                                                                |
|  | José Luiz da Costa<br>Vieira, MD             | Alice Manica Muller                  |                |                                                                                                                |
|  | Gabriel Grossmann<br>, MD                    | Maria Antonieta<br>Pereira de Moraes |                |                                                                                                                |
|  | Pedro Píccaro de<br>Oliveira, MD             | Bruna Maria Ascoli                   |                |                                                                                                                |
|  | Leonardo Bridi, MD                           | Silvia Zottis Poletti                |                |                                                                                                                |
|  | Simone Savaris,<br>MD                        |                                      |                |                                                                                                                |
|  | João V Vitola, MD,<br>PhD                    |                                      | Curitiba       | Quanta Diagnostico &<br>Terapia (33)                                                                           |
|  | Rodrigo J Cerci,<br>MD, Msc                  | Sandra S. Zier, BSc                  |                |                                                                                                                |
|  | Fabio R Farias,<br>MD, Msc                   | Vilmar Veiga Jr, BSc                 |                |                                                                                                                |
|  | Miguel M<br>Fernandes, MD,<br>PhD            |                                      |                |                                                                                                                |
|  | José Antonio<br>Marin-Neto, MD,<br>PhD       |                                      | Ribeirao Preto | Hospital das Clinicas da<br>Faculdade de Medicina<br>de Ribeirão Preto da<br>Universidade de São<br>Paulo (31) |
|  | André Schmidt,<br>MD, PhD                    |                                      |                |                                                                                                                |
|  | Moysés de Oliveira<br>Lima Filho, MD,<br>PhD | Diego Franca da<br>Cunha             |                |                                                                                                                |

|  |                                     |                               |                 |                                                                                 |
|--|-------------------------------------|-------------------------------|-----------------|---------------------------------------------------------------------------------|
|  | Ricardo Mendes Oliveira, MD         |                               |                 |                                                                                 |
|  | João Reynaldo Abbud Chierice, MD    |                               |                 |                                                                                 |
|  | Carísi A. Polanczyk, MD             | Guilherme G Rucatti, PsyD     | Porto Alegre    | Hospital de Clínicas de Porto Alegre (12)                                       |
|  | Mariana V. Furtado, MD              | Fernanda Igansi, BSc          |                 |                                                                                 |
|  | Luis F. Smidt, MD                   | Mauren P Haeffner, BSc        |                 |                                                                                 |
|  | Antonio Carlos Carvalho, MD         | Viviane Almeida               | Sao Paulo       | Unifesp - Hospital Sao Paulo (9)                                                |
|  | Gustavo Pucci, MD                   | Gabriela Sanchez de Souza     |                 |                                                                                 |
|  | Flavio Lyra, MD                     |                               |                 |                                                                                 |
|  | Alvaro Rabelo Alves Junior, MD      | Mayana Almeida                | Salvador        | Fundacao Bahiana de Cardilogia (9)                                              |
|  |                                     | Viviane dos Santos            |                 |                                                                                 |
|  | Marianna D. A. Dracoulakis, MD, PhD | Natalia S Oliveira, RN        | Salvador        | Hospital da Bahia (8)                                                           |
|  | Rodolfo G. S. D Lima, MD            |                               |                 |                                                                                 |
|  | Estevao Figueiredo, MD              | Bruna Edilena Paulino Azevedo | Belo Horizonte  | Hospital Lifecenter (8)                                                         |
|  | Paulo Ricardo Caramori, MD          | Marco Bizzaro Santos          | Porto Alegre    | Hospital Sao Lucas da Pontificia Universidade Catolica do Rio Grande do Sol (7) |
|  |                                     | Amanda Germann                |                 |                                                                                 |
|  |                                     | Vitor Gomes                   |                 |                                                                                 |
|  |                                     | Rosa Homem                    |                 |                                                                                 |
|  |                                     | Ellen Magedanz                |                 |                                                                                 |
|  | Rogério Tumelero, MD                | Rosane Laimer                 | Fundo           | Hospital Sao Vicente de Paulo (5)                                               |
|  |                                     | Alexandre Tognon              |                 |                                                                                 |
|  | Frederico Dall'Orto, MD             |                               | Pocos de Caldas | Hospital Maternidade e Pronto Socorro Santa Lucia (4)                           |
|  | Claudio T. Mesquita, MD             | Roberta P Santos, RN          | Botafogo        | Hospital Pró-Cardíaco (3)                                                       |

|                      |                                               |                               |           |                                      |
|----------------------|-----------------------------------------------|-------------------------------|-----------|--------------------------------------|
|                      | Alexandre S. Colafranceschi, MD               |                               |           |                                      |
|                      |                                               |                               |           |                                      |
|                      | Amarino C. Oliveira Jr., MD                   |                               |           |                                      |
|                      | Luiz A. Carvalho, MD                          |                               |           |                                      |
|                      | Isabella C. Palazzo, MD                       |                               |           |                                      |
|                      | Andre S. Sousa, MD                            |                               |           |                                      |
|                      | Expedito Eustáquio Ribeiro da Silva, MD, PhD  |                               |           |                                      |
|                      | Pedro Gabriel Melo de Barros e Silva, MD, PhD | Mariana Yumi Okada, RN        |           |                                      |
|                      | Luciana de Pádua Silva Baptista, MD, PhD      | Ana Paula Batista, RN         | Sao Paulo | Hospital TotalCor (2)                |
|                      | Marcelo Jamus Rodrigues, MD                   | Aline Nogueira Rabaça, BS     |           |                                      |
|                      | Marcos Valério Coimbra de Resende, MD, PhD    |                               |           |                                      |
|                      |                                               | Larissa Miranda Trama         |           |                                      |
|                      | Jose Francisco Saraiva, MD                    | Talita Silva                  | Sao Paulo | Hospital Celso Pierro (1)            |
|                      |                                               | Camila Thais de Souza Ormundo |           |                                      |
|                      |                                               | Carla Vicente                 |           |                                      |
|                      |                                               |                               |           |                                      |
|                      | Costantino Costantini, MD, PhD                | Caroline Pinheiro             | Curitiba  | Hospital Cardiologico Costantini (1) |
|                      |                                               | Daniele Komar                 |           |                                      |
| Poland (333)         |                                               |                               |           |                                      |
| Country Leaders      |                                               |                               |           |                                      |
| Witold Ruzyllo, MD   |                                               |                               |           |                                      |
| Hanna Szwed, MD, PhD |                                               |                               |           |                                      |

|                             |                                               |                      |          |                                                                                           |
|-----------------------------|-----------------------------------------------|----------------------|----------|-------------------------------------------------------------------------------------------|
| Country<br>Coordinator      |                                               |                      |          |                                                                                           |
| Radoslaw Pracon,<br>MD, PhD |                                               |                      |          |                                                                                           |
|                             | Marcin Demkow,<br>MD, PhD                     |                      | Warsaw   | Coronary and Structural<br>Heart Diseases<br>Department, Institute of<br>Cardiology (127) |
|                             | Radoslaw Pracon,<br>MD, PhD                   |                      |          |                                                                                           |
|                             | Cezary Kepka, MD<br>PhD                       |                      |          |                                                                                           |
|                             | Anna Teresinska,<br>MD PhD                    | Olga Walesiak        |          |                                                                                           |
|                             | Karolina Kryczka,<br>MD PhD                   | Katarzyna Malinowska |          |                                                                                           |
|                             | Jan Henzel, MD<br>PhD                         |                      |          |                                                                                           |
|                             | Mateusz Solecki,<br>MD PhD                    |                      |          |                                                                                           |
|                             | Edyta Kaczmarska,<br>MD PhD                   |                      |          |                                                                                           |
|                             | Tomasz Mazurek,<br>MD, PhD                    | Jakub Maksym, MD     | Warszawa | Medical University of<br>Warsaw (48)                                                      |
|                             |                                               | Karolina Wojtera, MD |          |                                                                                           |
|                             |                                               | Anna Fojt, MD        |          |                                                                                           |
|                             |                                               | Ewa Szczerba, MD     |          |                                                                                           |
|                             | Jaroslaw Drozd,<br>PhD                        |                      | Lodz     | Cardiology Clinic,<br>Medical University in<br>Lodz (43)                                  |
|                             | Bartosz Czarniak,<br>MD                       |                      |          |                                                                                           |
|                             | Malgorzata Frach<br>(formerly Stasiak),<br>MD |                      |          |                                                                                           |
|                             | Konrad Szymczyk,<br>MD                        |                      |          |                                                                                           |
|                             | Iwona<br>Niedzwiecka, MD                      |                      |          |                                                                                           |
|                             | Sebastian<br>Sobczak, MD                      |                      |          |                                                                                           |
|                             | Tomasz Ciurus,<br>MD                          |                      |          |                                                                                           |

|  |                                      |                           |        |                                                                                               |
|--|--------------------------------------|---------------------------|--------|-----------------------------------------------------------------------------------------------|
|  | Piotr Jakubowski,<br>MD              |                           |        |                                                                                               |
|  | Magdalena Misztal-<br>Teodorczyk, MD |                           |        |                                                                                               |
|  | Dawid Teodorczyk,<br>MD              | Marta Swiderek, MA        |        |                                                                                               |
|  | Aleksandra<br>Fratczak, MD           | Ewelina Wojtala, MA       |        |                                                                                               |
|  | Marcin Szkopiak,<br>MD               |                           |        |                                                                                               |
|  | Patrycja Lebioda,<br>MD              |                           |        |                                                                                               |
|  | Michał Włodarczyk,<br>MD             |                           |        |                                                                                               |
|  | Anna Plachcinska,<br>MD              |                           |        |                                                                                               |
|  | Jacek Kusmierk,<br>MD                |                           |        |                                                                                               |
|  | Magdalena Miller,<br>MD              |                           |        |                                                                                               |
|  | Halina Marciniak,<br>MD              |                           |        |                                                                                               |
|  | Karolina Wojtczak-<br>Soska, MD      |                           |        |                                                                                               |
|  | Katarzyna Łuczak,<br>MD              |                           |        |                                                                                               |
|  | Tomasz Tarchalski,<br>MD             |                           |        |                                                                                               |
|  | Anna Cichocka-<br>Radwan, MD         |                           |        |                                                                                               |
|  | Hanna Szwed, MD,<br>PhD              | Jaroslav Karwowski,<br>MD | Warsaw | National Institute of<br>Cardiology, Warsaw<br>(35)                                           |
|  | Grazyna Anna<br>Szulczyk, MD         |                           |        |                                                                                               |
|  | Adam Witkowski,<br>MD, PhD           |                           | Warsaw | Department of<br>Interventional<br>Cardiology & Angiology,<br>Institute of Cardiology<br>(20) |
|  | Krzysztof Kukuła,<br>MD, PhD         |                           |        |                                                                                               |

|                     |                                  |                                 |           |                                                                                                                                                                                                  |
|---------------------|----------------------------------|---------------------------------|-----------|--------------------------------------------------------------------------------------------------------------------------------------------------------------------------------------------------|
|                     | Małgorzata Celińska-Spodar, MD   |                                 |           |                                                                                                                                                                                                  |
|                     | Joanna Zalewska, MD              |                                 |           |                                                                                                                                                                                                  |
|                     | Grzegorz Gajos, MD, PhD          |                                 | Krakow    | Department of Coronary Disease, John Paul II Hospital, Jagiellonian University Medical College (16)                                                                                              |
|                     | Krzysztof Bury, MD, PhD          |                                 |           |                                                                                                                                                                                                  |
|                     | Piotr Pruszczyk, MD, PhD         | Andrzej Łabyk, MD               | Warszawa  | Department of Internal Medicine and Cardiology, Infant Jesus Teaching Hospital, Medical University of Warsaw (15)                                                                                |
|                     | Marek Roik, MD, PhD              | Agnieszka Szramowska, MD        |           |                                                                                                                                                                                                  |
|                     |                                  | Olga Zdończyk, MD               |           |                                                                                                                                                                                                  |
|                     | Krystyna Łoboz-Grudzień, MD, PhD | Joanna Jaroch, MD, PhD          | Wrocław   | T.Marciniak Hospital (11)                                                                                                                                                                        |
|                     | Leszek Sokalski, MD, PhD         |                                 |           |                                                                                                                                                                                                  |
|                     | Barbara Brzezińska, MD, PhD      |                                 |           |                                                                                                                                                                                                  |
|                     | Maciej Lesiak, Professor, MD     |                                 | Poznan    | Szpital Kliniczny Przemienienia Pańskiego (10)                                                                                                                                                   |
|                     | Magdalena Łanocha, MD            |                                 |           |                                                                                                                                                                                                  |
|                     | Krzysztof W. Reczuch, MD         | Adam Kolodziej, MD              | Wrocław   | Military Hospital / Medical University (4)                                                                                                                                                       |
|                     | Zbigniew Kalarus, MD             |                                 | Zabrze    | Medical University of Silesia, School of Medicine with the Division of Dentistry, Department of Cardiology, Congenital Heart Diseases and Electrotherapy, Silesian Center for Heart Diseases (3) |
|                     | Andrzej Swiatkowski, MD          |                                 |           |                                                                                                                                                                                                  |
|                     | Mariola Szulik, MD               |                                 |           |                                                                                                                                                                                                  |
|                     | Włodzimierz J. Musiał, MD        | Marta Marcinkiewicz-Siemion, MD | Białystok | University Hospital in Białystok (1)                                                                                                                                                             |
| Russia (303)        |                                  |                                 |           |                                                                                                                                                                                                  |
| Country Coordinator |                                  |                                 |           |                                                                                                                                                                                                  |

|                        |                                      |                        |                  |                                                                                                        |
|------------------------|--------------------------------------|------------------------|------------------|--------------------------------------------------------------------------------------------------------|
| Olga Bockeria, MD, PhD |                                      |                        |                  |                                                                                                        |
|                        | Leo Bockeria, MD, PhD                | Olga Bockeria, MD, PhD | Moscow           | National Medical Research Center for Cardiovascular Surgery (113)                                      |
|                        | Karen Petrosyan, MD, PhD             | Zalina Kudzoeva, MD    |                  |                                                                                                        |
|                        | Tatiana Trifonova, MD                | Nodira Aripova, MD     |                  |                                                                                                        |
|                        | Alexander M. Chernyavskiy, MD, PhD   | Ivan A. Naryshkin, MD  | Novosibirsk      | E.Meshalkin National Medical Research Center of the Ministry of Health of the Russian Federation (101) |
|                        | Evgeniy I. Kretov, MD                | Alena Kuleshova, MD    |                  |                                                                                                        |
|                        | Igor O. Grazhdankin, MD              | Dastan Malaev, MD      |                  |                                                                                                        |
|                        | Leonid L. Bershtein, MD, PhD         |                        | Saint Petersburg | North-Western State Medical University (50)                                                            |
|                        | Sergey A. Sayganov, MD, PhD          | Irina Subbotina        |                  |                                                                                                        |
|                        | Anastasia M. Kuzmina-Krutetskaya, MD | Victoria Gumerova      |                  |                                                                                                        |
|                        | Elizaveta V. Zbyshevskaya, MD, PhD   |                        |                  |                                                                                                        |
|                        | Nana O. Katamadze, MD, PhD           |                        |                  |                                                                                                        |
|                        | Elena A. Demchenko, MD, PhD          | Olga B. Nikolaeva, MD  | Saint Petersburg | Federal Almazov North-West Medical Research Centre (39)                                                |
|                        | Pavel S. Kozlov, MD                  |                        |                  |                                                                                                        |
|                        | Vikentiy Y. Kozulin, MD              |                        |                  |                                                                                                        |
|                        | Ekaterina I. Lubinskaya, MD          |                        |                  |                                                                                                        |
| *Spain (286)           |                                      |                        |                  |                                                                                                        |
| Country Leader         |                                      |                        |                  |                                                                                                        |

|                                 |                                       |                                   |                        |                                                                                                                                                        |
|---------------------------------|---------------------------------------|-----------------------------------|------------------------|--------------------------------------------------------------------------------------------------------------------------------------------------------|
| Jose Luis Lopez-Sendon, MD, PhD |                                       |                                   |                        |                                                                                                                                                        |
| Country Coordinator             |                                       |                                   |                        |                                                                                                                                                        |
| Almudena Castro, MD             |                                       |                                   |                        |                                                                                                                                                        |
|                                 | Jose Lopez-Sendon, MD, PhD            | Virginia Fernández-Figares, Pharm | Madrid                 | Hospital La Paz. IdiPaz (118)                                                                                                                          |
|                                 | Almudena Castro, MD                   |                                   |                        |                                                                                                                                                        |
|                                 | Elena Refoyo Salicio, MD              |                                   |                        |                                                                                                                                                        |
|                                 | Gabriela Guzman, MD                   |                                   |                        |                                                                                                                                                        |
|                                 | Gabriel Galeote, MD                   |                                   |                        |                                                                                                                                                        |
|                                 | Silvia Valbuena, MD                   |                                   |                        |                                                                                                                                                        |
|                                 | Jesús Peteiro, MD, PhD                |                                   | A Coruna               | Complejo Hospitalario Universitario A Coruña (CHUAC) Sergas, Department of Cardiology. INIBIC A Coruña. CIBER-CV. Universidad de A Coruña, Spain (112) |
|                                 | María Dolores Martínez-Ruíz, MD       |                                   |                        |                                                                                                                                                        |
|                                 | Ruth Pérez-Fernández, MD              | Moisés Blanco-Calvo, PhD          |                        |                                                                                                                                                        |
|                                 | José J Cuenca-Castillo, MD            | Encarnación Alonso-Álvarez, BSc   |                        |                                                                                                                                                        |
|                                 | Xacobe Flores-Ríos, MD                | Paula García-González, BSc        |                        |                                                                                                                                                        |
|                                 | Óscar Prada-Delgado, MD               |                                   |                        |                                                                                                                                                        |
|                                 | Gonzalo Barge-Caballero, MD           |                                   |                        |                                                                                                                                                        |
|                                 | Jose Ramon Gonzalez Juanatey, MD, PhD | Jose Seijas Amigo, Pharm          | Santiago de Compostela | Hospital Clinico Universitario de Santiago (17)                                                                                                        |
|                                 | Miguel Souto Bayarri, MD, PhD         |                                   |                        |                                                                                                                                                        |
|                                 | Virginia Pubull Nuñez, MD             |                                   |                        |                                                                                                                                                        |

|  |                                    |                            |           |                                                                |
|--|------------------------------------|----------------------------|-----------|----------------------------------------------------------------|
|  | Raymundo Ocaranza Sanchez, MD, PhD |                            |           |                                                                |
|  | Belen Cid Alvarez, MD              |                            |           |                                                                |
|  | Carlos Peña Gil, MD, PhD           |                            |           |                                                                |
|  | Amparo Martinez Monzonis, MD       |                            |           |                                                                |
|  | Alessandro Sionis, MD              | Ana Fernández Martínez, RN | Barcelona | Hospital de la Santa Creu i Sant Pau (11)                      |
|  | Montserrat Vila Perales, MD        |                            |           |                                                                |
|  | Josep Maria Padró, MD              |                            |           |                                                                |
|  | Antonio Serra Peñaranda, MD        |                            |           |                                                                |
|  | Joan García Picart, MD             |                            |           |                                                                |
|  | Antonino Ginel Iglesias, MD        |                            |           |                                                                |
|  | Xavier Garcia-Moll Marimon, MD     |                            |           |                                                                |
|  | Guillem Pons Lladó, MD             |                            |           |                                                                |
|  | Francesc Carreras Costa, MD        |                            |           |                                                                |
|  | Vicente Miro, MD                   |                            |           |                                                                |
|  | Jose L Diez, MD                    |                            |           |                                                                |
|  | Pilar Calvillo, MD                 |                            |           |                                                                |
|  | F. Marin Ortuño, MD, PhD           |                            | Murcia    | HUVA, Hospital Clínico Universitario Virgen De La Arrixaca (8) |
|  | M. Valdés Chávarri, MD, PhD        | M. Quintana Giner, MD      |           |                                                                |
|  | A. Tello Montolliu, MD, PhD        | A.I. Romero Aniorte, MD    |           |                                                                |
|  | E. Pinar Bermudez, MD, PhD         | JM. Rivera Caravaca, MD    |           |                                                                |

|                      |                                 |                             |           |                                                               |
|----------------------|---------------------------------|-----------------------------|-----------|---------------------------------------------------------------|
|                      | G. De La Morena, MD, PhD        |                             |           |                                                               |
|                      | Montserrat Gracida Blancas, MD  | Olga Cañavate               | Barcelona | Hospital De Bellvitge (4)                                     |
|                      |                                 | Sonia Guerrero              |           |                                                               |
|                      |                                 | Silvia Riera                |           |                                                               |
|                      | Jose Enrique Castillo Luena, MD | Jose Enrique Castillo Luena | Zaragoza  | Hospital Universitario Miguel Servet (4)                      |
|                      |                                 | Maria Lasala                |           |                                                               |
|                      | Francisco Fernandez-Aviles, MD  | Maria Lorenzo               | Madrid    | Hospital General Universitario Gregorio Maranon (2)           |
|                      |                                 | Olga Sobrino                |           |                                                               |
|                      |                                 | Alexandra Vazquez           |           |                                                               |
| China (246)          |                                 |                             |           |                                                               |
| Country Leader       |                                 |                             |           |                                                               |
| Lixin Jiang, MD, PhD |                                 |                             |           |                                                               |
|                      | Jiyan Chen, MD                  | Haojian Dong                | Guangzhou | Guangdong General Hospital (102)                              |
|                      |                                 | Peiyu He                    |           |                                                               |
|                      |                                 | Chunli Xia                  |           |                                                               |
|                      |                                 | Junqing Yang                |           |                                                               |
|                      |                                 | Qi Zhong                    |           |                                                               |
|                      | Yongjian Wu, MD, PhD            | Yanmeng Tian, MD            | Beijing   | Chinese Academy of Medical Sciences, Fuwai Hospital (17)      |
|                      |                                 | Dongze Li                   | Urumqi    | First Affiliated Hospital of Xinjiang Medical University (15) |
|                      | Yitong Ma, MD                   | Xiaomei Li                  |           |                                                               |
|                      | Yining Yang, MD                 | Xiang Ma                    |           |                                                               |
|                      |                                 | Zixiang Yu                  |           |                                                               |
|                      |                                 | Qian Zhao                   |           |                                                               |
|                      | Zheng Ji, MD                    | Chunguang Li                | Tangshan  | Tangshan Gongren Hospital (15)                                |
|                      |                                 | Lei Zhang                   |           |                                                               |
|                      |                                 | Yu Zhao                     |           |                                                               |
|                      |                                 | Bolin Zhu                   |           |                                                               |
|                      | Xinchun Yang, MD                | Mulei Chen                  | Beijing   |                                                               |
|                      |                                 | Hongjie Chi                 |           |                                                               |

|  |                  |                  |           |                                                             |
|--|------------------|------------------|-----------|-------------------------------------------------------------|
|  |                  | Yang Wang        |           | Beijing Chao-yang Hospital, Capital Medical University (12) |
|  |                  | Jing Zhang       |           |                                                             |
|  | Wenhua Lin, MD   | Rui Jing         | Tianjing  | TEDA International Cardiovascular Hospital (12)             |
|  |                  | Jingjing Liu     |           |                                                             |
|  | Hesong Zeng, MD  | Qiang Zhou, MD   | Wuhan     | Tongji Medical College (11)                                 |
|  |                  | Chang Xu, MD     |           |                                                             |
|  |                  | Zhuxi Li, MD     |           |                                                             |
|  |                  | Junhua Li, MD    |           |                                                             |
|  |                  | Luyang Xiong, MD |           |                                                             |
|  | Xin Fu, MD       | Dan Gao          | Zhengzhou | The First Affiliated Hospital of Zhengzhou University (11)  |
|  |                  | Dengke Jiang     |           |                                                             |
|  |                  | Ran Leng         |           |                                                             |
|  |                  | Xutong Wang      |           |                                                             |
|  |                  | Qianqian Yuan    |           |                                                             |
|  |                  | Lili Zhang       |           |                                                             |
|  | Bin Yang, MD     | Ziliang Bai      | Taiyuan   | Shanxi Cardiovascular Hospital (10)                         |
|  |                  | Jianhua Li       |           |                                                             |
|  |                  | Jie Qi           |           |                                                             |
|  |                  | Fei Wang         |           |                                                             |
|  |                  | Haitao Wang      |           |                                                             |
|  |                  | Bin Yang         |           |                                                             |
|  |                  | Zhou Yue         |           |                                                             |
|  |                  | Zhulin Zhang     |           |                                                             |
|  | Songtao Wang, MD | Yumei Dong       | Qingdao   | Qingdao Fuwai Hospital (8)                                  |
|  |                  | Jiajia Mao       |           |                                                             |
|  |                  | Bin Zhang        |           |                                                             |
|  | Gong Cheng, MD   | Xiuhong Li       | Xian      | Shanxi Provincial People's Hospital (6)                     |
|  |                  | Xiaowei Yao      |           |                                                             |
|  |                  | Nier Zhong       |           |                                                             |
|  |                  | Ning Zhou        |           |                                                             |
|  | Yulan Zhao, MD   | Yaping Huang, MS | Zhengzhou |                                                             |

|  |                        |                       |          |                                                                                        |
|--|------------------------|-----------------------|----------|----------------------------------------------------------------------------------------|
|  |                        | Panpan Zhou, MS       |          | The Second Affiliated Hospital of Zhengzhou University (6)                             |
|  | Xuehua Fang, MD        | Wei Su                | Beijing  | Liangxiang Hospital, Beijing Fangshan District (6)                                     |
|  | Qiutang Zeng, MD       | Yu Kunwu              | Wuhan    | Wuhan Union Hospital, Tongji Medical College, Huazhong Science and Tech University (3) |
|  |                        | Yudong Peng           |          |                                                                                        |
|  |                        | Xin Su                |          |                                                                                        |
|  | Xi Su, MD              | Chen Wang             | Wuhan    | Wuhan Asia Heart Hospital (3)                                                          |
|  |                        | Yunhai Zhao           |          |                                                                                        |
|  | Qingxian Li, MD        | Yaming Geng           | Jining   | Affiliated Hospital of Jining Medical University (3)                                   |
|  |                        | Yanfu Wang            |          |                                                                                        |
|  | Shao-ping Nie, MD, PhD | Jing-yao Fan, MD      | Beijing  | Beijing Anzhen Hospital (2)                                                            |
|  |                        | Si-ting Feng, MD,PhD  |          |                                                                                        |
|  |                        | Xiao Wang, MD,PhD     |          |                                                                                        |
|  |                        | Yan Yan, MD,PhD       |          |                                                                                        |
|  |                        | Hui-min Zhang, MD,PhD |          |                                                                                        |
|  | Qin Yu, MD             | Lingping Chi          | Dalian   | Affiliated Zhongshan Hospital of Dalian University (2)                                 |
|  |                        | Fang Liu              |          |                                                                                        |
|  | Jian'an Wang, MD       | Han Chen              | Hangzhou | The Second Affiliated Hospital Zhejiang University School of Medicine (1)              |
|  |                        | Jun Jiang             |          |                                                                                        |
|  |                        | Huajun Li             |          |                                                                                        |
|  |                        | Jian'an Wang          |          |                                                                                        |
|  |                        | Yechen Han, MM        | Beijing  | Peking Union Medical College Hospital (1)                                              |
|  |                        | Lihong Xu, RN         |          |                                                                                        |
|  | Shuyang Zhang, MD, PhD | Zhenyu Liu            |          |                                                                                        |
|  | Zhenyu Liu, MD         | Gang Chen             |          |                                                                                        |
|  |                        | Rongrong Hu           |          |                                                                                        |
|  | *Italy (139)           |                       |          |                                                                                        |
|  | Country Leader         |                       |          |                                                                                        |
|  | Aldo P. Maggioni, MD   |                       |          |                                                                                        |

|  |                        |                          |          |                                                                                           |
|--|------------------------|--------------------------|----------|-------------------------------------------------------------------------------------------|
|  | Gian Piero Perna, MD   | Francesca Pietrucci, PhD | Ancona   | Cardiology and CCU - Ospedali Riuniti Ancona (54)                                         |
|  | Marco Marini, MD       |                          |          |                                                                                           |
|  | Gabriele Gabrielli, MD |                          |          |                                                                                           |
|  | Stefano Provasoli, MD  | Anna Di Donato           | Varese   | Ospedale di Circolo e Fondazione Macchi (23)                                              |
|  | Edoardo Verna, MD      |                          |          |                                                                                           |
|  | Lorenzo Monti, MD      |                          | Rozzano  | Humanitas Research Hospital, Rozzano (MI) (17)                                            |
|  | Barbara Nardi, MD      |                          |          |                                                                                           |
|  | Antonio Di Chiara, MD  | Francesca Pezzetta, MD   | Tolmezzo | Azienda Servizi Sanitaria n.3 Alto Friuli-Collinare-Medio Friuli (9)                      |
|  | Andrea Mortara, MD     | Valentina Casali, MD     | Monza    | Policlinico di Monza, Monza MB (8)                                                        |
|  | Marcello Galvani, MD   | Chiara Attanasio         | Forli    | Ospedale "G.B. Morgagni – L. Pierantoni" Forli (AUSL della Romagna) (8)                   |
|  | Filippo Ottani, MD     |                          |          |                                                                                           |
|  | Marco Sicuro, MD       | Gianpiero Leone, MD      | Aosta    | Ospedale Regionale Umberto Parini (5)                                                     |
|  |                        | Francesco Pisano, MD     |          |                                                                                           |
|  |                        | Cristina Bare, BSc       |          |                                                                                           |
|  | Paolo Calabro, MD      | Fabio Fimiani            | Napoli   | AORN Dei Colli "V. Monaldi" UOC Cardiologia Università della Campania "L. Vanvitelli" (4) |
|  | Tiziana Formisano, MD  |                          |          |                                                                                           |
|  | Giuseppe Tarantini, MD | Alberto Barioli, MD      | Padua    | University of Padua-Cardiology Clinic (3)                                                 |
|  | Umberto Cucchini, MD   | Federica Ramani          |          |                                                                                           |
|  | Anto Luigi Andres, MD  |                          |          |                                                                                           |
|  | Emanuela Racca, MD     | Fabrizio Rolfo, MD       | Cuneo    | Azienda Ospedaliera S. Croce e Carle (3)                                                  |
|  |                        | Cecilia Goletto          |          |                                                                                           |
|  | Carlo Briguori, MD     | Francesca De Micco       | Naples   | Clinica Mediterranea (2)                                                                  |

|                           |                            |                      |                         |                                                       |
|---------------------------|----------------------------|----------------------|-------------------------|-------------------------------------------------------|
|                           | Roberto Amati, MD          | Stefano Di Marco, MD | Pescia                  | UO Cardiologia<br>Ospedale SS Cosma e<br>Damiano (2)  |
|                           | William Vergoni,<br>MD     | Martina Tricoli      |                         |                                                       |
|                           | Aldo Russo, MD             | Massimo Villella, MD | San Giovanni<br>Rotondo | IRCCS "Casa Sollievo<br>della Sofferenza" (1)         |
|                           | Raffaele Fanelli,<br>MD    |                      |                         |                                                       |
| *Singapore (61)           |                            |                      |                         |                                                       |
| Country Leader            |                            |                      |                         |                                                       |
| Harvey Douglas White, DSc |                            |                      |                         |                                                       |
| Country Coordinator       |                            |                      |                         |                                                       |
| Caroline Alsweiler        |                            |                      |                         |                                                       |
|                           | Kian-Keong Poh,<br>MD      |                      | Singapore               | National University<br>Heart Center Singapore<br>(33) |
|                           | Ping Chai, MD              |                      |                         |                                                       |
|                           | Titus Lau, MD              |                      |                         |                                                       |
|                           | Joshua P. Loh, MD          |                      |                         |                                                       |
|                           | Edgar L. Tay, MD           |                      |                         |                                                       |
|                           | Kristine Teoh, MD          | Sik-Yin V Tan, BSc   |                         |                                                       |
|                           | Lynette L. Teo, MD         | Winnie C Sia, BSc    |                         |                                                       |
|                           | Ching-Ching Ong,<br>MD     | Audrey W Leong, BSc  |                         |                                                       |
|                           | Raymond C. Wong,<br>MD     |                      |                         |                                                       |
|                           | Poay-Huan Loh,<br>MD       |                      |                         |                                                       |
|                           | Theodoros Kofidis,<br>MD   |                      |                         |                                                       |
|                           | Wan Xian Chan,<br>MD       |                      |                         |                                                       |
|                           | Koo Hui Chan, MD           |                      |                         |                                                       |
|                           | David Foo, MBBS            | Li Hai Yan, RN       | Singapore               | Tan Tock Seng Hospital<br>(22)                        |
|                           | Jason Loh Kwok<br>Kong, MD |                      |                         |                                                       |
|                           | Ching Min Er, MD           |                      |                         |                                                       |
|                           | Fahim Haider<br>Jafary, MD |                      |                         |                                                       |

|                       |                                  |                             |           |                                                                  |
|-----------------------|----------------------------------|-----------------------------|-----------|------------------------------------------------------------------|
|                       | Terrance Chua,<br>MD             | Nasrul Ismail               | Singapore | National Heart Centre<br>Singapore (6)                           |
|                       |                                  | Min Tun Kyaw                |           |                                                                  |
|                       |                                  | Deborah Yip                 |           |                                                                  |
| Germany (54)          |                                  |                             |           |                                                                  |
| Country Leader        |                                  |                             |           |                                                                  |
| Rolf Doerr, MD        |                                  |                             |           |                                                                  |
|                       | Rolf Doerr, MD                   |                             | Dresden   | Praxisklinik Herz und<br>Gefaesse (29)                           |
|                       | Juergen Stumpf,<br>MD            | Dorit Grahl                 |           |                                                                  |
|                       | Klaus Matschke,<br>MD, PhD       | Franziska Guenther          |           |                                                                  |
|                       | Gregor Simonis,<br>MD, PhD       | Kerstin Bonin               |           |                                                                  |
|                       | Clemens T.<br>Kadalie, MD        |                             |           |                                                                  |
|                       | Udo Sechtem, MD                  | Ina Wenzelburger            | Stuttgart | Robert-Bosch-<br>Krankenhaus (22)                                |
|                       | Peter Ong, MD                    | Susanne<br>Gruensfelder, RN |           |                                                                  |
|                       | P. Christian<br>Schulze, MD, PhD |                             | Jena      | University Hospital<br>Jena (2)                                  |
|                       | Bjoern Goebel, MD                |                             |           |                                                                  |
|                       | Karsten Lenk, MD                 |                             |           |                                                                  |
|                       | Georg Nickenig,<br>MD            | Jan-Malte Sinning,<br>MD    | Bonn      | Universitätsklinikum<br>Bonn (1)                                 |
|                       |                                  | Marcel Weber, MD            |           |                                                                  |
|                       |                                  | Nikos Werner, MD            |           |                                                                  |
| Austria (50)          |                                  |                             |           |                                                                  |
| Country Leaders       |                                  |                             |           |                                                                  |
| Irene Marthe Lang, MD |                                  |                             |           |                                                                  |
| Kurt Huber, MD        |                                  |                             |           |                                                                  |
|                       | Herwig<br>Schuchlenz, MD         | Gudrun Steinmaurer          | Graz      | LKH Graz West Austria<br>(35)                                    |
|                       | Stefan Weikl, MD                 |                             |           |                                                                  |
|                       | Irene Marthe Lang,<br>MD         | Max-Paul Winter, MD         | Vienna    | Medical University of<br>Vienna, Department of<br>Cardiology (8) |

|                             |                                   |                                       |          |                                                                                                            |
|-----------------------------|-----------------------------------|---------------------------------------|----------|------------------------------------------------------------------------------------------------------------|
|                             |                                   | Tijana, Andric, MD                    | Vienna   | Wilhelminen Hospital<br>Vienna (7)                                                                         |
|                             | Kurt Huber, MD                    | Maximilian, Tscharre,<br>MD           |          |                                                                                                            |
|                             | Gabriele, Jakl-<br>Kotauschek, MD | Claudia, Wegmayr,<br>MSc              |          |                                                                                                            |
|                             |                                   | Bernhard, Jäger, MD                   |          |                                                                                                            |
|                             |                                   | Florian, Egger, MD                    |          |                                                                                                            |
| Hungary (49)                |                                   |                                       |          |                                                                                                            |
| Country Leader              |                                   |                                       |          |                                                                                                            |
| Matyas Keltai, MD, PhD, DSc |                                   |                                       |          |                                                                                                            |
|                             | Andras Vertes, MD                 | Judit Sebo, MD                        | Budapest | Eszzsk- Szent Istvan<br>Hospital (20)                                                                      |
|                             |                                   | Zoltan Davidovits, MD                 |          |                                                                                                            |
|                             |                                   | Laszlone Matics                       |          |                                                                                                            |
|                             | Albert Varga, MD,<br>PhD          | Gergely Ágoston, MD                   | Szeged   | University of Szeged<br>(12)                                                                               |
|                             | Geza Fontos, MD                   | Gabor Dekany, MD                      | Budapest | George Gottsegen<br>National Institute of<br>Cardiology (9)                                                |
|                             | Bela Merkely, MD,<br>PhD, DSc     | Andrea Bartykowszki,<br>MD            | Budapest | Heart and Vascular<br>Center, Semmelweis<br>University (8)                                                 |
|                             |                                   | Pal Maurovich-Horvat,<br>MD, PhD, MPH |          |                                                                                                            |
|                             | Gabor Kerecsen,<br>MD             | Agnes Jakal                           | Budapest | Military Hospital,<br>Budapest (1)                                                                         |
| Serbia (47)                 |                                   |                                       |          |                                                                                                            |
|                             | Sasa Hinic, MD,<br>BSc            | Jelena Djokic, MD                     | Belgrade | University Hospital<br>Center Bezanijska Kosa<br>(13)                                                      |
|                             | Marija Zdravkovic,<br>MD, PhD     |                                       |          |                                                                                                            |
|                             | Vladan<br>Mudrenovic, MD          |                                       |          |                                                                                                            |
|                             | Bogdan Crnokrak,<br>MD            |                                       |          |                                                                                                            |
|                             | Branko D. Beleslin,<br>MD, PhD    |                                       | Belgrade | Faculty of Medicine,<br>University of Belgrade;<br>Cardiology Clinic,<br>Clinical Center of<br>Serbia (10) |
|                             | Nikola N. Boskovic,<br>MD         | Ana D. Djordjevic-<br>Dikic, MD, PhD  |          |                                                                                                            |

|             |                                 |                               |                  |                                                                                                                              |
|-------------|---------------------------------|-------------------------------|------------------|------------------------------------------------------------------------------------------------------------------------------|
|             | Marija T. Petrovic, MD          | Vojislav L. Giga, MD, PhD     |                  |                                                                                                                              |
|             | Milan R. Dobric, MD             | Jelena J. Stepanovic, MD, PhD |                  |                                                                                                                              |
|             | Zeljko Z. Markovic, MD, PhD     |                               |                  |                                                                                                                              |
|             | Ana S. Mladenovic, MD, PhD      |                               |                  |                                                                                                                              |
|             | Nada Cemerlic-Adjic, MD         | Lazar Velicki, MD             | Sremska Kamenica | Institute of Cardiovascular Diseases Vojvodina, Sremska Kamenica, Serbia and Faculty of Medicine, University of Novi Sad (9) |
|             |                                 | Ljiljana Pupic                |                  |                                                                                                                              |
|             | Goran Davidović, MD, PhD        | Stefan M. Simović, MD         | Kragujevac       | Clinical Center Kragujevac (7)                                                                                               |
|             | Rada Vučić, MD                  |                               |                  |                                                                                                                              |
|             | Milica Nikola Dekleva, MD PhD   | Miroslav Stevo Martinovic, MD | Belgrade         | University Clinical Hospital Zvezdara (6)                                                                                    |
|             |                                 | Gordana Stevanovic            |                  |                                                                                                                              |
|             | Goran Stankovic, MD             | Milan Dobric                  | Belgrade         | Clinical Center of Serbia (1)                                                                                                |
|             | Svetlana Apostolovic, MD        | Sonja Salinger Martinovic     | Nis              | Clinic for Cardiovascular Diseases, Clinical Center Nis (1)                                                                  |
|             |                                 | Dragana Stanojevic            |                  |                                                                                                                              |
| Mexico (46) |                                 |                               |                  |                                                                                                                              |
|             | Jorge Escobedo, MD              | Ramon de Jesús-Pérez, RN      | Benito Juarez    | Instituto Mexicano del Seguro Social (35)                                                                                    |
|             | Rubén Baleón-Espinosa, MD       |                               |                  |                                                                                                                              |
|             | Arturo S Campos-Santaolalla, MD |                               |                  |                                                                                                                              |
|             | Elihú Durán-Cortés, MD          |                               |                  |                                                                                                                              |
|             | José M Flores-Palacios, MD      |                               |                  |                                                                                                                              |
|             | Andrés García-Rincón, MD        |                               |                  |                                                                                                                              |
|             | Moisés Jiménez-Santos, MD       |                               |                  |                                                                                                                              |

|                                            |                                            |                                             |                     |                                                         |
|--------------------------------------------|--------------------------------------------|---------------------------------------------|---------------------|---------------------------------------------------------|
|                                            | Joaquín V Peñafiel, MD                     |                                             |                     |                                                         |
|                                            | José A Ortega-Ramírez, MD                  |                                             |                     |                                                         |
|                                            | Aquiles Valdespino-Estrada, MD             |                                             |                     |                                                         |
|                                            | Erick Alexánderson Rosas, MD               | María Fernanda Canales Brassetti, MD        | Mexico City         | Instituto Nacional de Cardiología "Ignacio Chávez" (11) |
|                                            |                                            | Diego Adrián Vences Anaya, MD               |                     |                                                         |
|                                            |                                            | María Pérez García                          |                     |                                                         |
|                                            |                                            | Isabel Estela Carvajal Juárez, MD           |                     |                                                         |
|                                            |                                            | Magdalena Madero Rovalo, MC                 |                     |                                                         |
|                                            |                                            | Erick Donato Morales Rodríguez, MD          |                     |                                                         |
| Australia (45)                             |                                            |                                             |                     |                                                         |
| Country Leaders                            |                                            |                                             |                     |                                                         |
| Joseph B. Selvanayagam, MBBS (Hons), DPhil |                                            |                                             |                     |                                                         |
| Jamie Rankin, MBBS ( <i>past</i> )         |                                            |                                             |                     |                                                         |
| Country Coordinator                        |                                            |                                             |                     |                                                         |
| Deirdre Murphy                             |                                            |                                             |                     |                                                         |
|                                            | Joseph B. Selvanayagam, MBBS (Hons), DPhil | Sau Lee, PhD                                | Adelaide            | Flinders Medical Centre (30)                            |
|                                            | Majo X. Joseph, MBBS                       | Prince Thomas, RN                           |                     |                                                         |
|                                            | Suku T. Thambar, MBBS                      | Melissa D Chaplin, RN                       | New Lambton Heights | John Hunter Hospital (8)                                |
|                                            |                                            | Stephanie C Boer, B Biotechnology (Honours) |                     |                                                         |
|                                            | John F. Beltrame, MD                       | Jeanette K. Stansborough, RN                | Woodville South     | The Queen Elizabeth Hospital (5)                        |
|                                            |                                            | Marilyn Black, RN                           |                     |                                                         |

|                           |                                |                                   |                           |                                                     |
|---------------------------|--------------------------------|-----------------------------------|---------------------------|-----------------------------------------------------|
|                           | Graham S. Hillis,<br>PhD       | Michelle M. Bonner, B.<br>Nursing | Perth                     | Royal Perth Hospital (2)                            |
|                           |                                | Kim F. Ireland, RN                |                           |                                                     |
|                           |                                | Clare Venn-Edmonds,<br>RN         |                           |                                                     |
| France (42)               |                                |                                   |                           |                                                     |
| Country Leader            |                                |                                   |                           |                                                     |
| Philippe-Gabriel Steg, MD |                                |                                   |                           |                                                     |
| Country Coordinators      |                                |                                   |                           |                                                     |
| Helene Abergel            |                                |                                   |                           |                                                     |
| Jean-Michel<br>Juliard    |                                |                                   |                           |                                                     |
|                           |                                | Corine Thobois, RN                | Chartres                  | C.H. Louis Pasteur (21)                             |
|                           | Christophe<br>Thuair, MD       | Emilie Tachot, RN                 |                           |                                                     |
|                           | Téodora Dutoiu,<br>MD          | Christophe Laure, RN              |                           |                                                     |
|                           |                                | Christel Vassaliere,<br>RN        |                           |                                                     |
|                           | Philippe Gabriel<br>Steg, MD   | Helene Abergel, MSc               | Paris                     | Bichat Hospital (9)                                 |
|                           | Jean-Michel<br>Juliard, MD     | Axelle Fuentes, MSc               |                           |                                                     |
|                           | Michel S. Slama,<br>MD         | Ludivine Eliahou, MD              | Clamart Cedex             | Antoine-Beclere<br>Hospital (5)                     |
|                           | Rami El Mahmoud,<br>MD         | Olivier Dubourg, MD               | Boulogne                  | Ambroise Pare Hospital<br>(2)                       |
|                           |                                | Pierre Michaud, MD                |                           |                                                     |
|                           | Eric Nicollet, MD              | Sarah Hadjih                      | Corbeil-Essonnes<br>Cedex | Centre Hospitalier Sud<br>Francilien (2)            |
|                           | Pascal Goube, MD               | Patricia Brito                    |                           |                                                     |
|                           | Gilles Barone-<br>Rochette, MD | Gilles Barone-<br>Rochette        | Grenoble                  | Grenoble University<br>Hospital (2)                 |
|                           | Alain Furber, MD               | Charles Cornet, MD,<br>PhD        | Angers Cedex 9            | Centre Hospitalier<br>Universitaire d'Angers<br>(1) |
|                           | Loïc Bière, MD                 | Jeremy Rautureau,<br>MD, PhD      |                           |                                                     |
| Lithuania (39)            |                                |                                   |                           |                                                     |
|                           |                                | Agne Juceviciene, MD              | Vilnius                   |                                                     |

|                   |                             |                                   |           |                                                     |
|-------------------|-----------------------------|-----------------------------------|-----------|-----------------------------------------------------|
|                   |                             | Irma Kalibataite-Rutkauskiene, MD |           |                                                     |
|                   |                             | Laura Keinaite                    |           |                                                     |
|                   | Aleksandras Laucevicius, MD | Monika Laukyte                    |           |                                                     |
|                   | Jelena Celutkiene, MD       | Gelmina Mikolaitiene              |           | Vilnius University Hospital Santariskes Clinic (39) |
|                   |                             | Akvile Smigelskaite, MD           |           |                                                     |
|                   |                             | Ilona Tamasauskiene, MD           |           |                                                     |
|                   |                             | Agne Urboniene, MD                |           |                                                     |
| *Netherlands (37) |                             |                                   |           |                                                     |
|                   | Elvin Kedhi MD, PhD         |                                   |           |                                                     |
|                   | Jorik Timmer, MD            | Ilse Bouwhuis                     | Zwolle    | Isala Klinieken (25)                                |
|                   | Rik Hermanides, MD          | Lia Nijmeijer                     |           |                                                     |
|                   | Eliza Kaplan, MD            |                                   |           |                                                     |
|                   | Robert K. Riezebos, MD, PhD |                                   |           |                                                     |
|                   | Pouneh Samadi, MD           | Jeannette, J. M. Schoep, RN       | Amsterdam | Cardio Research Hartcentrum OLVG (11)               |
|                   | Elise van Dongen, MD        | Elisabeth, M. Janzen, RN          |           |                                                     |
|                   | Sander R. Niehe, MD         |                                   |           |                                                     |
|                   | Harry Suryapranata, MD      | Sandra Ahoud                      | Nijmegen  | Radboudumc (1)                                      |
|                   | Stijn van Vugt, MD, PhD     |                                   |           |                                                     |
| Portugal (33)     |                             |                                   |           |                                                     |
|                   | Ruben Ramos, MD             |                                   |           |                                                     |
|                   | Duarte Cacula, MD           |                                   |           |                                                     |
|                   | Ana Santana, MD             |                                   | Lisbon    | Hospital de Santa Marta (25)                        |
|                   | Antonio Fiarresga, MD       |                                   |           |                                                     |

|                                 |                                |                                   |                   |                                                                  |
|---------------------------------|--------------------------------|-----------------------------------|-------------------|------------------------------------------------------------------|
|                                 | Lidia Sousa, MD                |                                   |                   |                                                                  |
|                                 | Hugo Marques, MD               |                                   |                   |                                                                  |
|                                 | Lino Patricio, MD              | Mafalda Selas                     |                   |                                                                  |
|                                 | Luis Bernanrdes, MD            | Filipa Silva                      |                   |                                                                  |
|                                 | Pedro Rio, MD                  | Cláudia Freixo                    |                   |                                                                  |
|                                 | Ramiro Carvalho, MD            |                                   |                   |                                                                  |
|                                 | Rui Ferreira, MD               |                                   |                   |                                                                  |
|                                 | Tiago Silva, MD                |                                   |                   |                                                                  |
|                                 | Ines Rodrigues, MD             |                                   |                   |                                                                  |
|                                 | Pedro Modas, MD                |                                   |                   |                                                                  |
|                                 | Guilherme Portugal, MD         |                                   |                   |                                                                  |
|                                 | Jose Fragata, MD               |                                   |                   |                                                                  |
|                                 | Fausto J. Pinto, PhD           | Inês Zimbarra Cabrita, PhD        | Lisbon            | Santa Maria University Hospital, Cardiology Department, CHLN (6) |
|                                 | Miguel Nobre Menezes, MD       | Andreia Rocha, MSc                |                   |                                                                  |
|                                 | Guilhermina Cantinho Lopes, MD | Francisca Patuleia Figueiras, PhD |                   |                                                                  |
|                                 | Ana Gomes Almeida, PhD         | Andreia Coelho, BSc               |                   |                                                                  |
|                                 | Pedro Canas Silva, MD          | Marta Capinha                     |                   |                                                                  |
|                                 | Angelo Nobre, MD               | Maria Inês Caetano                |                   |                                                                  |
|                                 | Ana Rita Francisco, MD         | Susana Silva                      |                   |                                                                  |
|                                 | Nuno Ferreira, MD              |                                   |                   |                                                                  |
|                                 | Ricardo L. Lopes, MD           |                                   | Vila Nova de Gaia | Centro Hospitalar de Vila Nova de Gaia/Espinho, EPE (2)          |
| Argentina (29)                  |                                |                                   |                   |                                                                  |
| Country Leader                  |                                |                                   |                   |                                                                  |
| Rafael Diaz, MD ( <i>past</i> ) |                                |                                   |                   |                                                                  |

|                           |                                      |                        |                                 |                                                     |
|---------------------------|--------------------------------------|------------------------|---------------------------------|-----------------------------------------------------|
|                           | Luis Guzman, MD                      | Veronica Tinnirello    | Cordoba                         | Instituto Medico DAMIC (11)                         |
|                           | Julio César Figal, MD                | Matías Nicolás Mungo   | Ciudad Autonoma de Buenos Aires | Fundación Favalaro (10)                             |
|                           | Oscar Méndiz, MD                     |                        |                                 |                                                     |
|                           | Claudia Cortés, MD                   |                        |                                 |                                                     |
|                           | Roberto René Favalaro, MD            |                        |                                 |                                                     |
|                           | Carlos Alvarez, MD                   | Marina Garcia          | Bahia Blanca                    | Hospital Italiano Regional del Sur Bahia Blanca (3) |
|                           | Javier Courtis, MD                   | Valeria Godoy          | Cordoba                         | Clinica Romagosa and Clinica De La Familia (2)      |
|                           | Gabriela Zeballos, MD                |                        |                                 |                                                     |
|                           | Lilia Schiavi, MD                    | Maria Victoria Actis   | Cordoba                         | Clinica Del Prado (2)                               |
|                           | Mariano Rubio, MD                    | Graciela Scaro, MD     | Cordoba                         | Clínica Privada Vélez Sarsfield (1)                 |
| *New Zealand (28)         |                                      |                        |                                 |                                                     |
| Country Leader            |                                      |                        |                                 |                                                     |
| Harvey Douglas White, DSc |                                      |                        |                                 |                                                     |
| Country Coordinator       |                                      |                        |                                 |                                                     |
| Caroline Alsweiler        |                                      |                        |                                 |                                                     |
|                           | Gerard Patrick Devlin, MD            | Liz Low, RN            | Hamilton                        | Waikato Hospital (22)                               |
|                           | Raewyn Fisher, MD                    | Jayne Scales, RN       |                                 |                                                     |
|                           |                                      | Kirsty Abercrombie, RN |                                 |                                                     |
|                           | Ralph Alan Huston Stewart, MBChB, MD | Leah Howell , RN       | Auckland                        | Auckland City Hospital (6)                          |
|                           | Harvey Douglas White, DSc            | Cathrine Patten, RN    |                                 |                                                     |
|                           | Jocelyne Benatar, MD                 |                        |                                 |                                                     |
| *Macedonia (28)           |                                      |                        |                                 |                                                     |
|                           | Sasko Kedev, MD, PhD                 |                        | Skopje                          | University Clinic of Cardiology (28)                |

|                                |                                         |                         |           |                                                |
|--------------------------------|-----------------------------------------|-------------------------|-----------|------------------------------------------------|
|                                | Irena Peovska Mitevaska, MD, PhD        |                         |           |                                                |
|                                | Elizabeta Srbinovska Kostovska, MD, PhD |                         |           |                                                |
|                                | Hristo Pejkov, MD, PhD                  |                         |           |                                                |
| *Sweden (23)                   |                                         |                         |           |                                                |
| Country Leader                 |                                         |                         |           |                                                |
| Claes Held, MD, PhD            |                                         |                         |           |                                                |
|                                | Claes Held, MD, PhD                     |                         | Uppsala   | Uppsala University (18)                        |
|                                | Kai Eggers, MD, PHhD                    |                         |           |                                                |
|                                | Gunnar Frostfelt, MD, PhD               | Christina Björklund, RN |           |                                                |
|                                | Nina Johnston, MD, PhD                  | Maria Andreasson, RN    |           |                                                |
|                                | Maciej Olsowka, MD                      | Marie Essermark, RN     |           |                                                |
|                                | Axel Åkerblom, MD, PhD                  |                         |           |                                                |
|                                | Inga Soveri, MD, PhD                    |                         |           |                                                |
|                                | Johannes Aspberg, MD                    | Liselotte Persson       | Stockholm | Karolinska Institutet at Danderyd Hospital (5) |
| Israel (15)                    |                                         |                         |           |                                                |
| Country Leaders                |                                         |                         |           |                                                |
| Rafael Beyar, MD, MD, DSc, MPH |                                         |                         |           |                                                |
| Tali Sharir, MD                |                                         |                         |           |                                                |
| Country Coordinator            |                                         |                         |           |                                                |
| Eugenia Nikolsky, MD           |                                         |                         |           |                                                |
|                                | Tali Sharir, MD                         | Or Harel, MA            | Tel-Aviv  | Assuta Medical Centers (9)                     |
|                                | Dan Elian, MD                           |                         |           |                                                |
|                                | Arthur Kerner, MD                       | Margalit Bentzvi        | Haifa     | Rambam Medical Center (6)                      |
|                                | Samia Massalha, MD                      | Ludmila Helmer          |           |                                                |
| Japan (14)                     |                                         |                         |           |                                                |

|                            |                            |                          |             |                                                 |
|----------------------------|----------------------------|--------------------------|-------------|-------------------------------------------------|
| Country Leader             |                            |                          |             |                                                 |
| Shun Kohsaka, MD           |                            |                          |             |                                                 |
|                            | Keiichi Fukuda, MD, PhD    | Ikuko Ueda, PhD          | Shinjuku-ku | Keio University (7)                             |
|                            | Shun Kohsaka, MD           | Jun Fujita, MD           |             |                                                 |
|                            | Satoshi Yasuda, MD, PhD    | Akemi Furukawa, RN       | Suita-shi   | National Cerebral and Cardiovascular Center (4) |
|                            |                            | Kanae Hirase, RN         |             |                                                 |
|                            |                            | Toshiyuki Nagai, MD, PhD |             |                                                 |
|                            |                            | Fumiyuki Otsuka, MD, PhD |             |                                                 |
|                            | Shigeyuki Nishimura, MD    | Shintaro Nakano          | Hidaka      | Saitama Medical University (3)                  |
| *Belgium (7)               |                            |                          |             |                                                 |
| Country Leader             |                            |                          |             |                                                 |
| Frans Van de Werf, MD, PhD |                            |                          |             |                                                 |
| Country Coordinator        |                            |                          |             |                                                 |
| Kaatje Goetschalckx, MD    |                            |                          |             |                                                 |
|                            | Kaatje Goetschalckx, MD    | Valerie Robesyn          | Leuven      | University Hospital Leuven (7)                  |
|                            | Frans Van de Werf, PhD, MD |                          |             |                                                 |
|                            | Kathleen Claes, PhD, MD    |                          |             |                                                 |
| *Taiwan (7)                |                            |                          |             |                                                 |
| Country Leader             |                            |                          |             |                                                 |
| Harvey Douglas White, DSc  |                            |                          |             |                                                 |
| Country Coordinator        |                            |                          |             |                                                 |
| Caroline Alsweiler         |                            |                          |             |                                                 |
|                            | Chung-Lieh Hung, MD        | Yi-Hsuan Yang            | Taipei City | Mackay Memorial Hospital (7)                    |
|                            | Chun-Ho Yun, MD            |                          |             |                                                 |
|                            | Charles Jia-Yin Hou, MD    |                          |             |                                                 |

|                      |                         |                                        |           |                                                      |
|----------------------|-------------------------|----------------------------------------|-----------|------------------------------------------------------|
|                      | Jen-Yuan Kuo, MD        |                                        |           |                                                      |
|                      | Hung-I Yeh, MD, PhD     |                                        |           |                                                      |
|                      | Ta-Chuan Hung, MD       |                                        |           |                                                      |
|                      | Jiun-Yi Li, MD, PhD     |                                        |           |                                                      |
|                      | Chen-Yen Chien, MD, PhD |                                        |           |                                                      |
|                      | Cheng-Ting Tsai, MD     |                                        |           |                                                      |
|                      | Chun-Chieh Liu, MD      |                                        |           |                                                      |
|                      | Fa-Chang Yu, MD         |                                        |           |                                                      |
|                      | Yueh-Hung Lin, MD       |                                        |           |                                                      |
|                      | Wei-Ren Lan, MD         |                                        |           |                                                      |
|                      | Chih-Hsuan Yen, MD      |                                        |           |                                                      |
|                      | Jui-Peng Tsai, MD       |                                        |           |                                                      |
|                      | Kuo-Tzu Sung, MD        |                                        |           |                                                      |
| *South Africa (7)    |                         |                                        |           |                                                      |
|                      | Mpiko Ntsekhe, MD       |                                        |           |                                                      |
|                      | Shaheen Pandie, MD      | Constance Philander (Nee Talliard), ND | Cape Town | Groote Schuur Hospital / University of Cape Town (7) |
|                      | Charle A Viljoen, MD    | Noloyiso Mtana, RN                     |           |                                                      |
|                      | Marianne De Andrade, MD |                                        |           |                                                      |
| *Switzerland (7)     |                         |                                        |           |                                                      |
| Country Leader       |                         |                                        |           |                                                      |
| Aldo P. Maggioni, MD |                         |                                        |           |                                                      |
|                      | Tiziano Moccetti, MD    | Adriana Anesini, RN                    | Lugano    | Cardiocentro (7)                                     |
|                      | M.Grazia Rossi, MD      | Simona Maspoli, RN                     |           |                                                      |

|                   |                                          |                                      |                  |                                                                                       |
|-------------------|------------------------------------------|--------------------------------------|------------------|---------------------------------------------------------------------------------------|
|                   |                                          | Manuela Mombelli,<br>RN              |                  |                                                                                       |
| Egypt (6)         |                                          |                                      |                  |                                                                                       |
|                   | Magdy<br>Abdelhamid, MD                  | Ahmed Talaat, MD                     | Cairo            | Cairo University (6)                                                                  |
|                   | Ahmed Adel, MD                           |                                      |                  |                                                                                       |
|                   | Ahmed Kamal,<br>MsC                      |                                      |                  |                                                                                       |
|                   | Hossam Mahrous,<br>MD                    |                                      |                  |                                                                                       |
|                   | Sameh El Kaffas,<br>MD                   |                                      |                  |                                                                                       |
|                   | Hussien El<br>Fishawy, MD                |                                      |                  |                                                                                       |
| Romania (5)       |                                          |                                      |                  |                                                                                       |
|                   | Calin Pop, MD,<br>PhD                    |                                      | Bucharest        | Emergency County<br>Hospital Baia Mare (4)                                            |
|                   | Matei Claudia, MD,<br>PhD                |                                      |                  |                                                                                       |
|                   | Bogdan A.<br>Popescu, MD, PhD            |                                      | Bucharest        | Emergency Institute of<br>Cardiovascular<br>Diseases "Prof. Dr. C.<br>C. Iliescu" (1) |
|                   | Carmen Ginghina,<br>MD, PhD              | Monica Rosca, MD,<br>PhD             |                  |                                                                                       |
|                   | Dan Deleanu, MD,<br>PhD                  | Carmen C. Beladan,<br>MD, PhD        |                  |                                                                                       |
|                   | Vlad A. Iliescu, MD,<br>PhD              |                                      |                  |                                                                                       |
| *Saudi Arabia (5) |                                          |                                      |                  |                                                                                       |
|                   | Mouaz H. Al-<br>Mallah, MD MSc           | Sarah Zahrani, RN                    | Central Province | King AbdulAziz Cardiac<br>Center (5)                                                  |
|                   | Ahmed Aljzeeri,<br>MD                    |                                      |                  |                                                                                       |
|                   | Hani Najm, MD                            |                                      |                  |                                                                                       |
|                   | Ali Alghamdi, MD                         |                                      |                  |                                                                                       |
| *Peru (4)         |                                          |                                      |                  |                                                                                       |
|                   | Walter Enrique<br>Mogrovejo Ramos,<br>MD | Marco Antonio<br>Monsalve Davila, RN | Mirafloes        | Instituto Neuro<br>Cardiovascular De Las<br>Americas (4)                              |

|                           |                                 |                          |            |                                        |
|---------------------------|---------------------------------|--------------------------|------------|----------------------------------------|
| Thailand (3)              |                                 |                          |            |                                        |
| Country Leader            |                                 |                          |            |                                        |
| Harvey Douglas White, DSc |                                 |                          |            |                                        |
| Country Coordinator       |                                 |                          |            |                                        |
| Caroline Alsweiler        |                                 |                          |            |                                        |
|                           | Srun Kuanprasert, MD            |                          | Chiang Mai | Maharaj Nakorn Chiang Mai Hospital (2) |
|                           | Arintaya Prommintikul, MD       |                          |            |                                        |
|                           | Weerachai Nawarawong, MD        | Supatchara Khwakhong, RN |            |                                        |
|                           | Surin Woragidpoonpol, MD        | Anong Chaiyasri, RN      |            |                                        |
|                           | Thitipong Tepsuwan, MD          | Warangkana Mekara, RN    |            |                                        |
|                           | Noppon Taksaudom, MD            | Supap Kulthawong, RN     |            |                                        |
|                           | Chataroon Rimsukcharoenchai, MD | Anong Amaritakomol, RN   |            |                                        |
|                           | Juntima Euathrongchit, MD       |                          |            |                                        |
|                           | Yutthaphan Wannasopha, MD       |                          |            |                                        |
|                           | Sukit Yamwong, MD               | Pachara Panpunuan, RN    | Bangkok    | Ramathibodi Hospital (1)               |
|                           | Piyamitr Sritara, MD            |                          |            |                                        |
|                           | Suthara Aramcharoen, MD         |                          |            |                                        |
|                           | Krissada Meemuk, MD             |                          |            |                                        |
| *Malaysia (2)             |                                 |                          |            |                                        |
| Country Leader            |                                 |                          |            |                                        |
| Harvey Douglas White, DSc |                                 |                          |            |                                        |
| Country Coordinator       |                                 |                          |            |                                        |
| Caroline Alsweiler        |                                 |                          |            |                                        |

|                                                                                      |                            |                             |              |                                |
|--------------------------------------------------------------------------------------|----------------------------|-----------------------------|--------------|--------------------------------|
|                                                                                      | Ahmad Khairuddin,<br>MD    | Noor Syamira<br>Mokhtar, RN | Kuala Lumpur | Institut Jantung Negara<br>(2) |
|                                                                                      | Hafidz Abd Hadi,<br>MD     | Nor Asiah Basri, RN         |              |                                |
|                                                                                      | Shaiful Azmi<br>Yahaya, MD | Irni Yusnida, RN            |              |                                |
|                                                                                      |                            | Humayrah Hashim             |              |                                |
|                                                                                      |                            |                             |              |                                |
| * Countries participated in Economics Quality of Life (EQoL) Questionnaires          |                            |                             |              |                                |
| **This site received one participant in transfer that was randomized at another site |                            |                             |              |                                |

**eTable 7. ISCHEMIA Committee, CCC, Trial-Related Personnel**

|                                               |
|-----------------------------------------------|
| <b>Past and Current Committee Members</b>     |
| <b>Leadership Committee</b>                   |
| Judith S. Hochman (Chair)                     |
| David J. Maron (Co-Chair)                     |
| William Boden (Co-Principal Investigator)     |
| Bruce Ferguson (Co-Principal Investigator)    |
| Robert Harrington (Co-Principal Investigator) |
| Gregg W. Stone (Co-Principal Investigator)    |
| David Williams (Co-Principal Investigator)    |
|                                               |
| <b>Executive Committee</b>                    |
| Judith S. Hochman (Chair)                     |
| David J. Maron (Co-Chair)                     |
| Karen P. Alexander                            |
| Sripal Bangalore                              |
| Jeffrey Berger                                |
| William Boden                                 |
| Robert Harrington                             |
| Daniel Mark                                   |
| Sean M. O'Brien                               |
| Harmony R. Reynolds                           |
| Yves Rosenberg                                |
| Leslee J. Shaw                                |
| John Spertus                                  |
| Gregg W. Stone                                |
|                                               |
| <b>Steering Committee</b>                     |
| Judith S. Hochman (Chair)                     |
| David J. Maron (Co-Chair)                     |
| <i>Members of Executive Committee</i>         |
| Christie Ballantyne *                         |
| Daniel Berman                                 |
| Rafael Beyar *                                |
| Balram Bhargava                               |
| Chris Buller *                                |
| Antonio (Tony) Carvalho**                     |
| Bernard R. Chaitman                           |
| Rafael Diaz *                                 |
| Rolf Doerr                                    |
| Vladimir Dzavik                               |
| Bruce Ferguson                                |
| Shaun Goodman                                 |

|                                          |
|------------------------------------------|
| Gilbert Gosselin                         |
| Rory Hachamovitch *                      |
| Christian Hamm *                         |
| Claes Held                               |
| Malte Helm *                             |
| Kurt Huber *                             |
| Lixin Jiang                              |
| Matyas Keltai                            |
| Shun Kohsaka                             |
| Irene Lang *                             |
| Renato Lopes                             |
| Jose Lopez-Sendon                        |
| Aldo Maggioni                            |
| John Mancini                             |
| C. Noel Bairey Merz                      |
| James Min                                |
| Eric Peterson *                          |
| Michael H. Picard                        |
| Witold Ruzyllo                           |
| Joseph Selvanayagam                      |
| Roxy Senior                              |
| Tali Sharir                              |
| Gabriel Steg                             |
| Hanna Szwed                              |
| Frans Van de Werf *                      |
| William Weintraub                        |
| Harvey White                             |
| David Williams                           |
|                                          |
| <b>Optimal Medical Therapy Committee</b> |
| William Boden (Co-Chair)                 |
| David J. Maron (Co-Chair)                |
| Christie Ballantyne                      |
| Sripal Bangalore                         |
| Karen Calfas **                          |
| Bernard R. Chaitman                      |
| Mary Ann Champagne                       |
| Michael Davidson                         |
| Jerome Fleg                              |
| Peter A. McCullough                      |
| Jonathan Newman                          |
| Peter Stone                              |
|                                          |

|                                                             |
|-------------------------------------------------------------|
| <b>Optimal Revascularization Therapy Planning Committee</b> |
| Gregg W. Stone (Chair)                                      |
| <b>Subcommittee: CABG</b>                                   |
| Bruce Ferguson (Co-Chair)                                   |
| Philippe Menasche (Co-Chair)                                |
| Sripal Bangalore                                            |
| Michael Davidson **                                         |
| Stephen Fremes                                              |
| Robert Guyton                                               |
| Michael Mack                                                |
| Fred Mohr                                                   |
| Anupama Rao                                                 |
| Joe Sabik                                                   |
| Oz Shapira                                                  |
| David Taggart                                               |
| James Tatoulis                                              |
|                                                             |
| <b>Subcommittee: PCI</b>                                    |
| David Williams (Co-Chair)                                   |
| Sripal Bangalore                                            |
| Jim Blankenship                                             |
| Sorin Brener                                                |
| Chris Buller                                                |
| Antonio Colombo                                             |
| Bernard de Bruyne                                           |
| Philippe Génèreux                                           |
| Robert Harrington                                           |
| Dean Kereiakes                                              |
| Thierry Lefevre                                             |
| Jeffrey Moses                                               |
|                                                             |
| <b>Clinical Events</b>                                      |
| <b>Endpoint Definition Panel</b>                            |
| Bernard R. Chaitman (Chair)                                 |
| Karen P. Alexander                                          |
| Judith S. Hochman                                           |
| Ken Mahaffey                                                |
| David J. Maron                                              |
| Gregg W. Stone                                              |
| Harvey White                                                |
| <b>Clinical Event Review Committee</b>                      |
| Bernard R. Chaitman (Chair)                                 |
| Salvador Cruz-Flores                                        |

|                                         |
|-----------------------------------------|
| Nicholas Danchin                        |
| Eli Feen                                |
| Mario J. Garcia                         |
| Paul Hauptman                           |
| Abhay A. Laddu                          |
| Eugene Passamani                        |
| Ileana L. Pina                          |
| Maarten Simoons                         |
| Hicham Skali                            |
| Kristian Thygesen                       |
| David Waters                            |
| <b>CEC Administrative Group</b>         |
| Karen P. Alexander                      |
| Patricia Endsley*                       |
| Gerard Esposito                         |
| Jeffrey Kanters                         |
| John Pownall                            |
| Dimitrios Stournaras                    |
|                                         |
| <b>ISCHEMIA Imaging Committee</b>       |
| Leslee J. Shaw (Chair)                  |
| Daniel Berman                           |
| Matthias Friedrich                      |
| Rory Hachamovitch                       |
| Raymond Kwong                           |
| John Mancini                            |
| James Min                               |
| Dana Oliver                             |
| Michael H. Picard                       |
| Harmony R. Reynolds                     |
|                                         |
| <b>Biostatistics Planning Committee</b> |
| Frank Harrell (Chair)                   |
| Jeffrey Blume                           |
| Kerry Lee                               |
| Sean M. O'Brien                         |
|                                         |
| <b>BioRepository Committee</b>          |
| Jeffrey Berger (Chair)                  |
| Claes Held                              |
| Iftikhar Kullo                          |
| Bruce McManus                           |
| Kristin Newby                           |

|                                               |
|-----------------------------------------------|
|                                               |
| <b>EQOL Committee</b>                         |
| Daniel Mark (Co-Chair)                        |
| John Spertus (Co-Chair)                       |
| David Cohen                                   |
| William Weintraub                             |
|                                               |
| <b>Recruitment for Women &amp; Minorities</b> |
| C. Noel Bairey Merz (Chair)                   |
| Raffaele Bugiardini                           |
| Jelena Celutkiene                             |
| Jorge Escobedo                                |
| Angela Hoye                                   |
| Radmila Lyubarova                             |
| Deirdre Mattina                               |
| Jesus Peteiro                                 |
| Harmony R. Reynolds                           |
| Paola Smanio                                  |
|                                               |
| <b>Publications</b>                           |
| David J. Maron (Chair)                        |
| Karen P. Alexander                            |
| Sripal Bangalore                              |
| Jeffrey Berger                                |
| William Boden                                 |
| Robert Harrington                             |
| Judith S. Hochman                             |
| Sean M. O'Brien                               |
| Harmony R. Reynolds                           |
| Yves Rosenberg                                |
| Gregg W. Stone                                |
| <b>Publication Subcommittees</b>              |
| <b>Economics</b>                              |
| Daniel Mark (Chair)                           |
| John Spertus                                  |
| <b>QOL</b>                                    |
| John Spertus (Chair)                          |
| Daniel Mark                                   |
| <b>Stress Testing</b>                         |
| Leslee J. Shaw (Chair)                        |
| Dan Berman                                    |
| Bernard R. Chaitman                           |
| Jerome Fleg                                   |

|                                                              |
|--------------------------------------------------------------|
| Raymond Kwong                                                |
| Michael H. Picard                                            |
| Harmony R. Reynolds                                          |
| Roxy Senior                                                  |
| <b>CCTA</b>                                                  |
| James Min (Chair)                                            |
| Jonathan Leipsic                                             |
| John Mancini                                                 |
| <b>Angiography/Optimal Revascularization Therapy</b>         |
| Gregg W. Stone (Chair)                                       |
| Ziad Ali (Co-chair)                                          |
| Sripal Bangalore                                             |
| T. Bruce Ferguson                                            |
| David Williams                                               |
| (Philippe Genereux, former Chair, Angiography Subcommittee)* |
| <b>Optimal Medical Therapy</b>                               |
| William Boden (Co-Chair)                                     |
| David J. Maron (Co-Chair)                                    |
| Jerome Fleg                                                  |
| Jonathan Newman                                              |
| <b>Biorepository</b>                                         |
| Jeffrey Berger (Chair)                                       |
| <b>CEC</b>                                                   |
| Bernard R. Chaitman (Chair)                                  |
| Karen P. Alexander                                           |
| <b>CKD</b>                                                   |
| Sripal Bangalore (Chair)                                     |
| Karen P. Alexander                                           |
| Jerome Fleg                                                  |
| Judith S. Hochman                                            |
| David J. Maron                                               |
| Roy Mathew                                                   |
| Sean M. O'Brien                                              |
| Harmony R. Reynolds                                          |
| Mandeep Sidhu                                                |
| <b>CIAO</b>                                                  |
| Harmony R. Reynolds (Chair)                                  |
|                                                              |
|                                                              |
| <b>DSMB Members</b>                                          |
| Lawrence Friedman (Chair)                                    |
| Jeffrey Anderson                                             |
| Jessica Berg *                                               |

|                                                                                    |
|------------------------------------------------------------------------------------|
| David DeMets                                                                       |
| C. Michael Gibson                                                                  |
| Gervasio Lamas                                                                     |
| Nicole Deming                                                                      |
| Jonathan Himmelfarb                                                                |
| Pamela Ouyang                                                                      |
| Pamela Woodard                                                                     |
|                                                                                    |
| <b><u>Independent Statistical Analysis Center for DSMB Reporting</u></b>           |
| Frank Harrell                                                                      |
| Samuel Nwosu                                                                       |
|                                                                                    |
| <b><u>NHLBI Program Staff</u></b>                                                  |
| <b>Project Office</b>                                                              |
| Yves Rosenberg (Project Officer)                                                   |
| Jerome Fleg                                                                        |
| Ruth Kirby                                                                         |
| <b>Statisticians</b>                                                               |
| Neal Jeffries                                                                      |
|                                                                                    |
| <b><u>ISCHEMIA Clinical Coordinating Center (CCC)</u></b>                          |
| <b>Study Leadership</b>                                                            |
| Judith S. Hochman (Study Chair, Director of CCC)                                   |
| David J. Maron (Study Co-Chair, Co-Director of CCC, US Country Leader)             |
| <b>CCC Faculty</b>                                                                 |
| Sripal Bangalore (Optimal Revascularization Therapy CCC Director, Regional Leader) |
| Jeffrey Berger (Director of the Biorepository, Regional Leader)                    |
| William Boden (US-VA Regional Leader)                                              |
| Jonathan Newman (Optimal Medical Therapy CCC Director, Regional Leader)            |
| Harmony R. Reynolds (Associate Director of CCC, CCC Imaging Lead, Regional Leader) |
| Mandeep Sidhu (US-VA Regional Co-Leader)                                           |
| <b>Program Directors</b>                                                           |
| Jean E. Denaro **                                                                  |
| Stephanie Mavromichalis                                                            |
| <b>Project Managers</b>                                                            |
| Kevin Chan                                                                         |
| Gia Cobb*                                                                          |
| Aira Contreras                                                                     |
| Diana Cukali*                                                                      |
| Stephanie Ferket*                                                                  |
| Andre Gabriel*                                                                     |
| Antonietta Hansen*                                                                 |

|                                                               |
|---------------------------------------------------------------|
| Arline Roberts                                                |
| <b><i>Clinical Research Associates</i></b>                    |
| Michelle Chang                                                |
| Sharder Islam*                                                |
| Graceanne Wayser*                                             |
| Solomon Yakubov *                                             |
| Michelle Yee                                                  |
| <b><i>Clinical Trial Assistants</i></b>                       |
| Caroline Callison                                             |
| Isabelle Hogan                                                |
| Albertina Qelaj*                                              |
| Charlotte Pirro*                                              |
| Kerrie Van Loo                                                |
| Brianna Wisniewski*                                           |
| <b><i>Grants and Finance Administration</i></b>               |
| Margaret Gilsenan (Grants Manager)                            |
| Bevin Lang                                                    |
| Samaa Mohamed                                                 |
| <b><i>Publications Team</i></b>                               |
| Jihyun Lyo (Publications Manager)                             |
| Nadia Gakou                                                   |
| <b><i>Data Analyst</i></b>                                    |
| Vincent Setang*                                               |
| Mark Xavier*                                                  |
|                                                               |
|                                                               |
| <b><u>Statistical and Data Coordinating Center (SDCC)</u></b> |
| Sean M. O'Brien (Principal Investigator)                      |
| Karen P. Alexander (Co-Principal Investigator)                |
| Akshay Bagai*                                                 |
| Samuel Broderick                                              |
| Michelle Crowder                                              |
| Derek Cyr                                                     |
| Patricia Endsley                                              |
| Jyotsna Garg                                                  |
| Xiangqiong Gu                                                 |
| Robert Harrington*                                            |
| Lisa Hatch                                                    |
| Anne Heath*                                                   |
| Zhen Huang                                                    |
| Jeffrey Kanters                                               |
| Kerry Lee*                                                    |
| Jeff Leimberger                                               |
| Jill Marcus                                                   |

|                                                                           |
|---------------------------------------------------------------------------|
| Courtney Page                                                             |
| Wanda Parker*                                                             |
| Wayne Pennachi                                                            |
| John Pownall                                                              |
| Frank Rockhold                                                            |
| Susanna Stevens                                                           |
| Allegra Stone                                                             |
| Dimitrios Stouraras                                                       |
| Omar Thompson                                                             |
| Sheri Ussery                                                              |
| Jennifer White*                                                           |
| Mary (Kaye) Williams                                                      |
| Weibing Xing                                                              |
| Songlin Zhu                                                               |
|                                                                           |
| <b><u>Economics and Quality of Life Coordinating Center (EQOL CC)</u></b> |
| <i>Duke Clinical Research Institute, Durham, NC</i>                       |
| Daniel B. Mark (Principal Investigator)                                   |
| Kevin Anstrom                                                             |
| Khaula Baloch                                                             |
| Janet Blount                                                              |
| Patricia Cowper                                                           |
| Linda Davidson-Ray                                                        |
| Laura Drew                                                                |
| Tina Harding                                                              |
| J David Knight                                                            |
| Diane Minshall Liu                                                        |
| Betsy O'Neal                                                              |
| Thomas Redick                                                             |
|                                                                           |
| <i>Saint Luke's Mid America Heart Institute, Kansas City, MO</i>          |
| John Spertus (Principal Investigator)                                     |
| Philip Jones                                                              |
| Karen Nugent                                                              |
| Grace Jingyan Wang                                                        |
|                                                                           |
| <b><u>ISCHEMIA Imaging Coordinating Center (ICC)</u></b>                  |
| Leslee J. Shaw (Principal Investigator)                                   |
| Lawrence Phillips                                                         |
| Abhinav Goyal                                                             |
| Holly Hetrick                                                             |
| Dana Oliver                                                               |
| <i>Nuclear Core Lab</i>                                                   |

|                                       |
|---------------------------------------|
| Daniel Berman (Director)              |
| Sean W. Hayes (Co-Director)           |
| John D. Friedman                      |
| R. James Gerlach                      |
| Mark Hyun                             |
| Romalisa Miranda-Peats                |
| Piotr Slomka                          |
| Louise Thomson                        |
| <u>CMR Core Lab</u>                   |
| Raymond Y. Kwong (Director)           |
| Matthias Friedrich (Director) *       |
| Francois Pierre Mongeon (Co-Director) |
| Steven Michael                        |
| <u>Echo Core Lab</u>                  |
| Michael H. Picard (Director)          |
| Judy Hung                             |
| Marielle Scherrer-Crosbie             |
| Xin Zeng                              |
|                                       |
| <b><u>ECG/ETT CoreLab</u></b>         |
| Bernard R. Chaitman (Director)        |
| Jane Eckstein                         |
| Bandula Guruge                        |
| Mary Streif                           |
|                                       |
| <b><u>Angiographic Core Lab</u></b>   |
| Ziad Ali (Director)                   |
| Philippe Genereux (Director) *        |
| Maria A. Alfonso                      |
| Maria P. Corral                       |
| Javier J. Garcia                      |
| Jennifer Horst                        |
| Ivana Jankovic                        |
| Maayan Konigstein                     |
| Mitchel B. Lustre*                    |
| Yolayfi Peralta                       |
| Raquel Sanchez                        |
|                                       |
| <b><u>CCTA Core Lab</u></b>           |
| James Min (Director)                  |
| Reza Arsanjani                        |
| Matthew Budoff                        |

|                                                                                                     |
|-----------------------------------------------------------------------------------------------------|
| Kimberly Elmore                                                                                     |
| Millie Gomez                                                                                        |
| Cameron Hague                                                                                       |
| Niree Hindoyan                                                                                      |
| Jonathan Leipsic                                                                                    |
| GB John Mancini                                                                                     |
| Rine Nakanishi                                                                                      |
| M. Barbara Srichai-Parsia                                                                           |
| Eunice Yeoh                                                                                         |
| Tricia Youn                                                                                         |
|                                                                                                     |
| <b><u>Academic Research Organizations (AROs)</u></b>                                                |
| <i><u>Associazione Nazionale Medici Cardiologi Ospedalieri (ANMCO) -Italy &amp; Switzerland</u></i> |
| Aldo P. Maggioni (Country Leader)                                                                   |
| Francesca Bianchini                                                                                 |
| Martina Ceseri                                                                                      |
| Andrea Lorimer                                                                                      |
| Marco Magnoni                                                                                       |
| Francesco Orso                                                                                      |
| Laura Sarti                                                                                         |
| Martinia Tricoli*                                                                                   |
| <i><u>Brazilian Clinical Research Institute (BCRI) - Brazil</u></i>                                 |
| Antonio Carvalho (Country Leader)**                                                                 |
| Renato Lopes (Country Leader)                                                                       |
| Lilian Mazza Barbosa                                                                                |
| Tauane Bello Duarte                                                                                 |
| Tamara Colaiácovo Soares                                                                            |
| Julia de Aveiro Morata                                                                              |
| Pedro Carvalho                                                                                      |
| Natalia de Carvalho Maffei                                                                          |
| Flávia Egydio*                                                                                      |
| Anelise Kawakami*                                                                                   |
| Janaina Oliveira*                                                                                   |
| Elissa Restelli Piloto*                                                                             |
| Jaqueline Pozzibon*                                                                                 |
| <i><u>Canadian Heart Research Centre (CHRC) - Canada</u></i>                                        |
| Shaun Goodman (Country Leader)                                                                      |
| Diane Camara                                                                                        |
| Neamat Mowafy                                                                                       |
| Caroline Spindler                                                                                   |
| <i><u>China Oxford Centre for International Health Research - China</u></i>                         |
| Lixin Jiang (Country Leader)                                                                        |
| Hao Dai                                                                                             |

|                                                                                                       |
|-------------------------------------------------------------------------------------------------------|
| Fang Feng                                                                                             |
| Jia Li                                                                                                |
| Li Li*                                                                                                |
| Jiamin Liu                                                                                            |
| Qiulan Xie                                                                                            |
| Haibo Zhang                                                                                           |
| Jianxin Zhang                                                                                         |
| Lihua Zhang                                                                                           |
| Liping Zhang                                                                                          |
| Ning Zhang                                                                                            |
| Hui Zhong                                                                                             |
| <i>Estudios Clínicos Latino America (ECLA) - Argentina</i>                                            |
| Rafael Diaz *                                                                                         |
| Claudia Escobar                                                                                       |
| Maria Eugenia Martin*                                                                                 |
| Andrea Pascual*                                                                                       |
| <i>Foundation for Biomedical Research of La Paz University Hospital (FIBHULP) - Spain</i>             |
| José Lopez-Sendon (Country Leader)                                                                    |
| Paloma Moraga                                                                                         |
| Victoria Hernandez                                                                                    |
| Almudena Castro                                                                                       |
| Maria Posada*                                                                                         |
| Sara Fernandez                                                                                        |
| José Luis Narro Villanueva                                                                            |
| Rafael Selgas                                                                                         |
| <i>French Alliance for Cardiovascular Trials (FACT) - France</i>                                      |
| Gabriel Steg (Country Leader)                                                                         |
| Helene Abergel                                                                                        |
| Jean Michel Juliard                                                                                   |
| <i>Green Lane Coordinating Centre Ltd. (GLCC) -Malaysia, New Zealand, Singapore, Taiwan, Thailand</i> |
| Harvey White (Country Leader)                                                                         |
| Caroline Alswelier                                                                                    |
| <i>KU Leuven Research &amp; Development - Belgium*</i>                                                |
| Frans Van de Werf (Country Leader)                                                                    |
| Kathleen Claes                                                                                        |
| Kaatje Goetschalckx                                                                                   |
| Ann Luyten                                                                                            |
| Valerie Robesyn                                                                                       |
| <i>South Australian Health and Medical Research Institute Ltd (SAHMRI) - Australia</i>                |
| Joseph B. Selvanayagam (Country Leader)                                                               |
| Deirdre Murphy                                                                                        |
|                                                                                                       |
| <b><u>Contract Research Organizations (CROs) for ISCHEMIA Trial</u></b>                               |
| <i>FOCUS Clinical Research Center d.o.o. Belgrade - Serbia</i>                                        |

|                                              |
|----------------------------------------------|
| Nevena Garcevic                              |
| Jelena Stojkovic                             |
| <i>iProcess Global Research Inc. - India</i> |
| Asker Ahmed                                  |
| Richa Bhatt                                  |
| Nitika Chadha*                               |
| Vijay Kumar*                                 |
| Sadath Lubna *                               |
| Pushpa Naik                                  |
| Shruti Pandey*                               |
| Karthik Ramasamy*                            |
| Mohammed Saleem                              |
| Pratiksha Sharma                             |
| Hemalata Siddaram*                           |
|                                              |
| <i>*past members / past organizations</i>    |
| <i>**deceased</i>                            |
